# Supplementary material
Source: PubMed Central journal article supplement (PMC7084111)
Supplement: NIHMS1068508-supplement-SI.pdf [file NIHMS1068508-supplement-SI.pdf]

# Supporting Information

## Structure Determination, Functional Characterization and Biosynthetic Implications of Nybomycin Metabolites from a Mining Reclamation Site-Associated *Streptomyces*

Xiachang Wang,<sup>†,‡,§</sup> Sherif I. Elshahawi,<sup>‡,§,⊥</sup> Larissa V. Ponomareva,<sup>‡,§</sup> Qing Ye,<sup>||</sup> Yang Liu,<sup>‡,§</sup> Gregory C. Copley,<sup>∇</sup> James C. Hower,<sup>∇</sup> Bruce E. Hatcher,<sup>¶</sup> Madan K. Kharel,<sup>◇</sup> Steven G. Van Lanen,<sup>§</sup> Qing-Bai She,<sup>||</sup> S. Randal Voss,<sup>#,Δ,□</sup> Jon S. Thorson,<sup>\*,‡,§</sup> Khaled A. Shaaban<sup>\*,‡,§</sup>

<sup>†</sup>Jiangsu Key Laboratory for Functional Substances of Chinese Medicine, Nanjing University of Chinese Medicine, Nanjing 210023, People's Republic of China

<sup>‡</sup>Center for Pharmaceutical Research and Innovation, and <sup>§</sup>Department of Pharmaceutical Sciences, College of Pharmacy, University of Kentucky, Lexington, Kentucky 40536, United States

<sup>⊥</sup>Department of Biomedical and Pharmaceutical Sciences, Chapman University School of Pharmacy, Irvine, California 92618, United States

<sup>||</sup>Markey Cancer Center, University of Kentucky, Lexington, Kentucky 40536, United States

<sup>∇</sup>Center for Applied Energy Research, University of Kentucky, Lexington, KY 40511, United States

<sup>¶</sup>Kentucky Energy and Environment Cabinet, Division of Water, 2642 Russellville Road, Bowling Green, Kentucky 42101, United States

<sup>◇</sup>School of Pharmacy, University of Maryland Eastern Shore, Princess Anne, Maryland 21853, United States

<sup>#</sup>Department of Neuroscience, <sup>Δ</sup>Ambystoma Genetic Stock Center, and <sup>□</sup>Spinal Cord and Brain Injury Research Center, University of Kentucky, Lexington, Kentucky 40506, United States

\*To whom correspondence should be addressed. Email: khaled\_shaaban@uky.edu; jsthorson@uky.edu

| Table of Contents                                                                                                                             | Page   |
|-----------------------------------------------------------------------------------------------------------------------------------------------|--------|
| <b>Scheme S1.</b> Work-up scheme of the metabolites produced by <i>Streptomyces</i> sp. AD-3-6                                                | S2     |
| <b>Figure S1.</b> Photograph of <i>Streptomyces</i> sp. AD-3-6 (7 day growth on M <sub>2</sub> -agar)                                         | S3     |
| <b>Figure S2.</b> Viability of A549 (non-small cell lung cancer) and PC3 (prostate cancer) human cell lines at 1 μM of compounds <b>1-9</b> . | S3     |
| <b>Figure S3.</b> Single dose ETR assay of compounds <b>1-9</b> at 1 μM.                                                                      | S4     |
| <b>Figures S4-S35.</b> MS and NMR spectra of compounds <b>1-9</b> .                                                                           | S5-S36 |
| <b>Figure S36.</b> HPLC-UV/MS analyses of standard <b>5</b> and putative product pseudonocardian A.                                           | S37    |

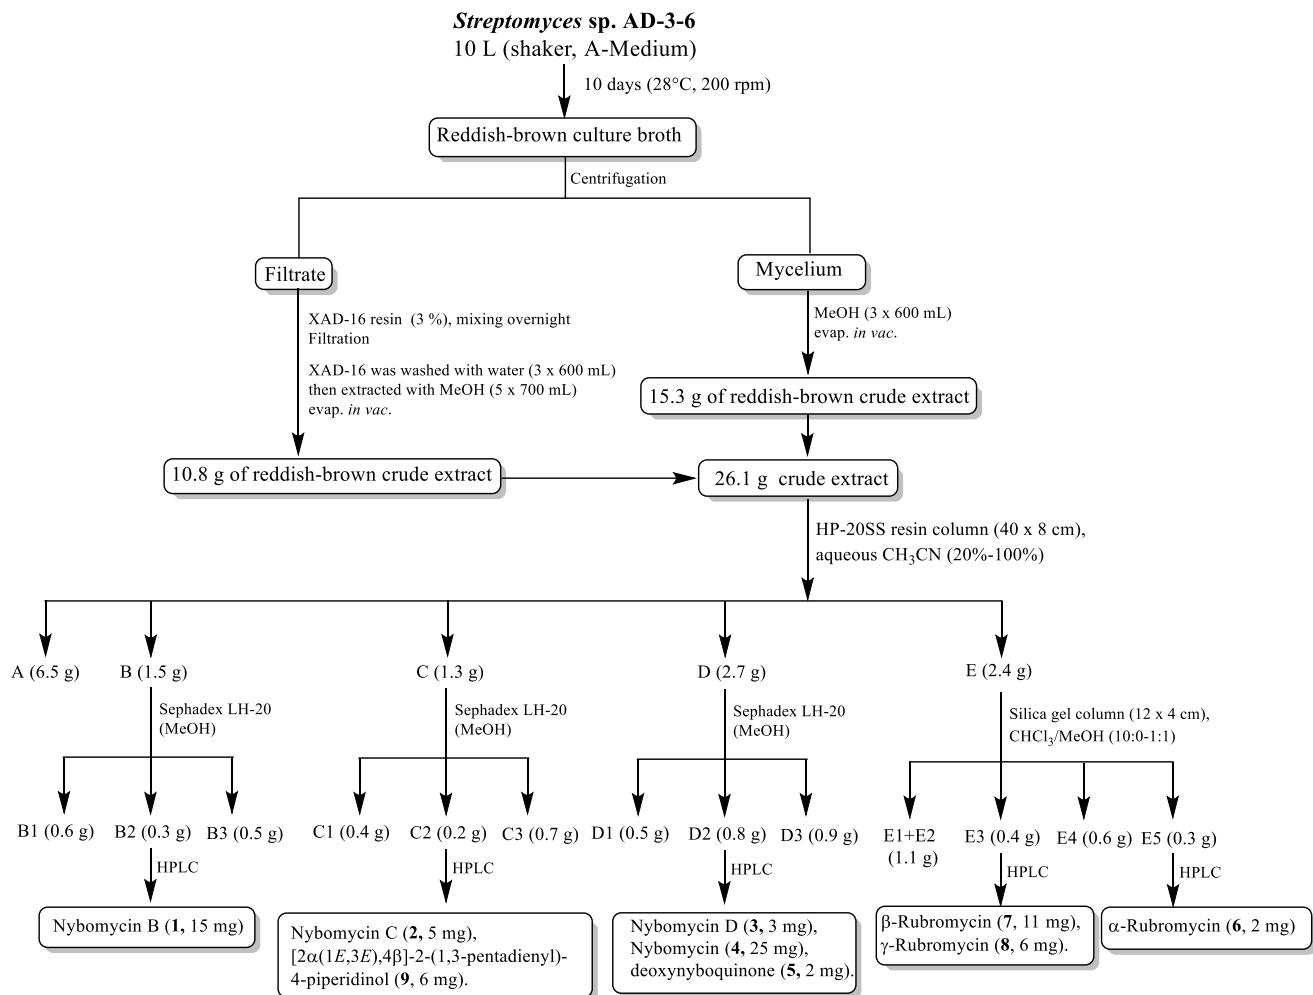

**Scheme S1.** Work-up scheme of the metabolites produced by *Streptomyces* sp. AD-3-6

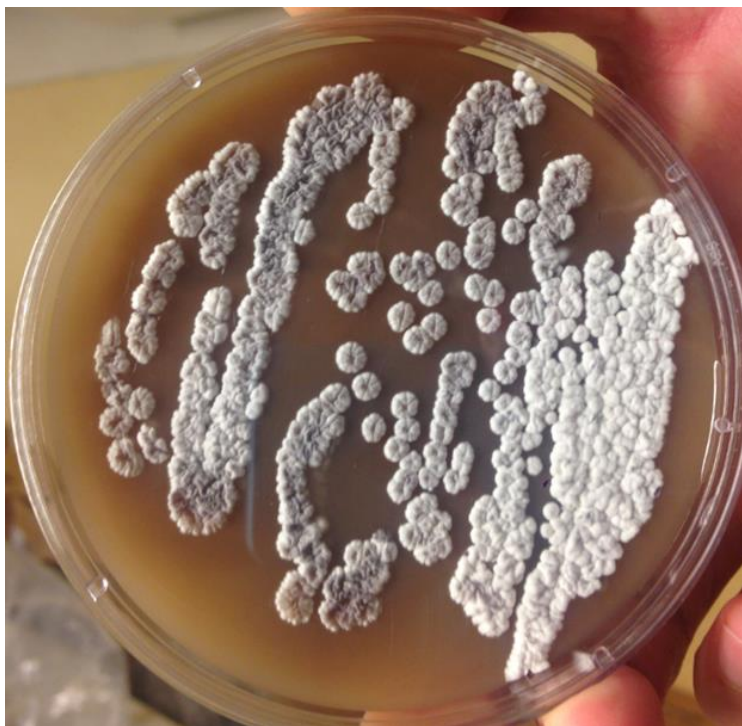

**Figure S1.** Photograph of *Streptomyces* sp. AD-3-6 (7 day growth, M<sub>2</sub>-agar).

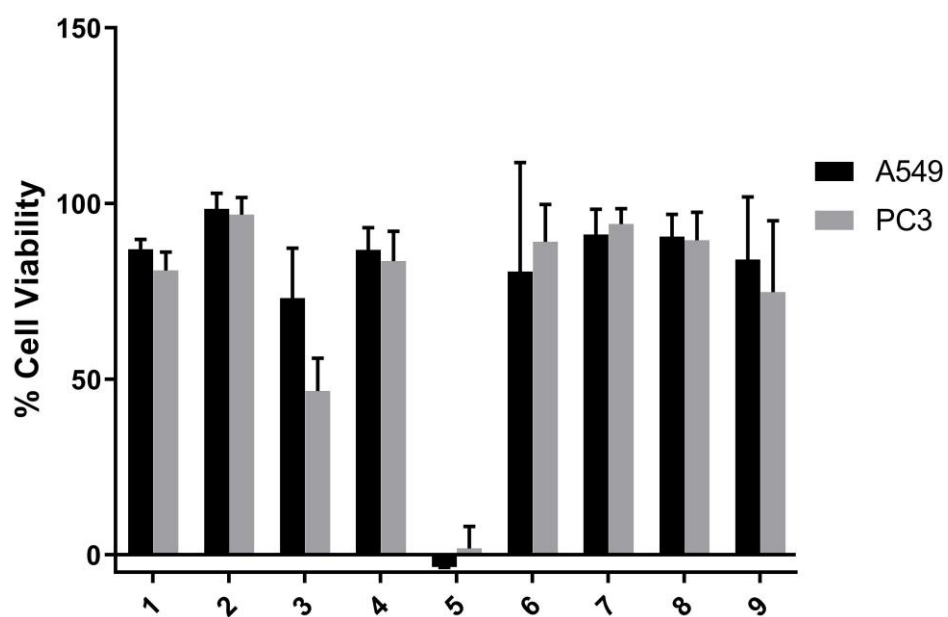

**Figure S2.** Viability of A549 (non-small cell lung cancer) and PC3 (prostate cancer) human cell lines at 1  $\mu$ M of compounds 1-9.

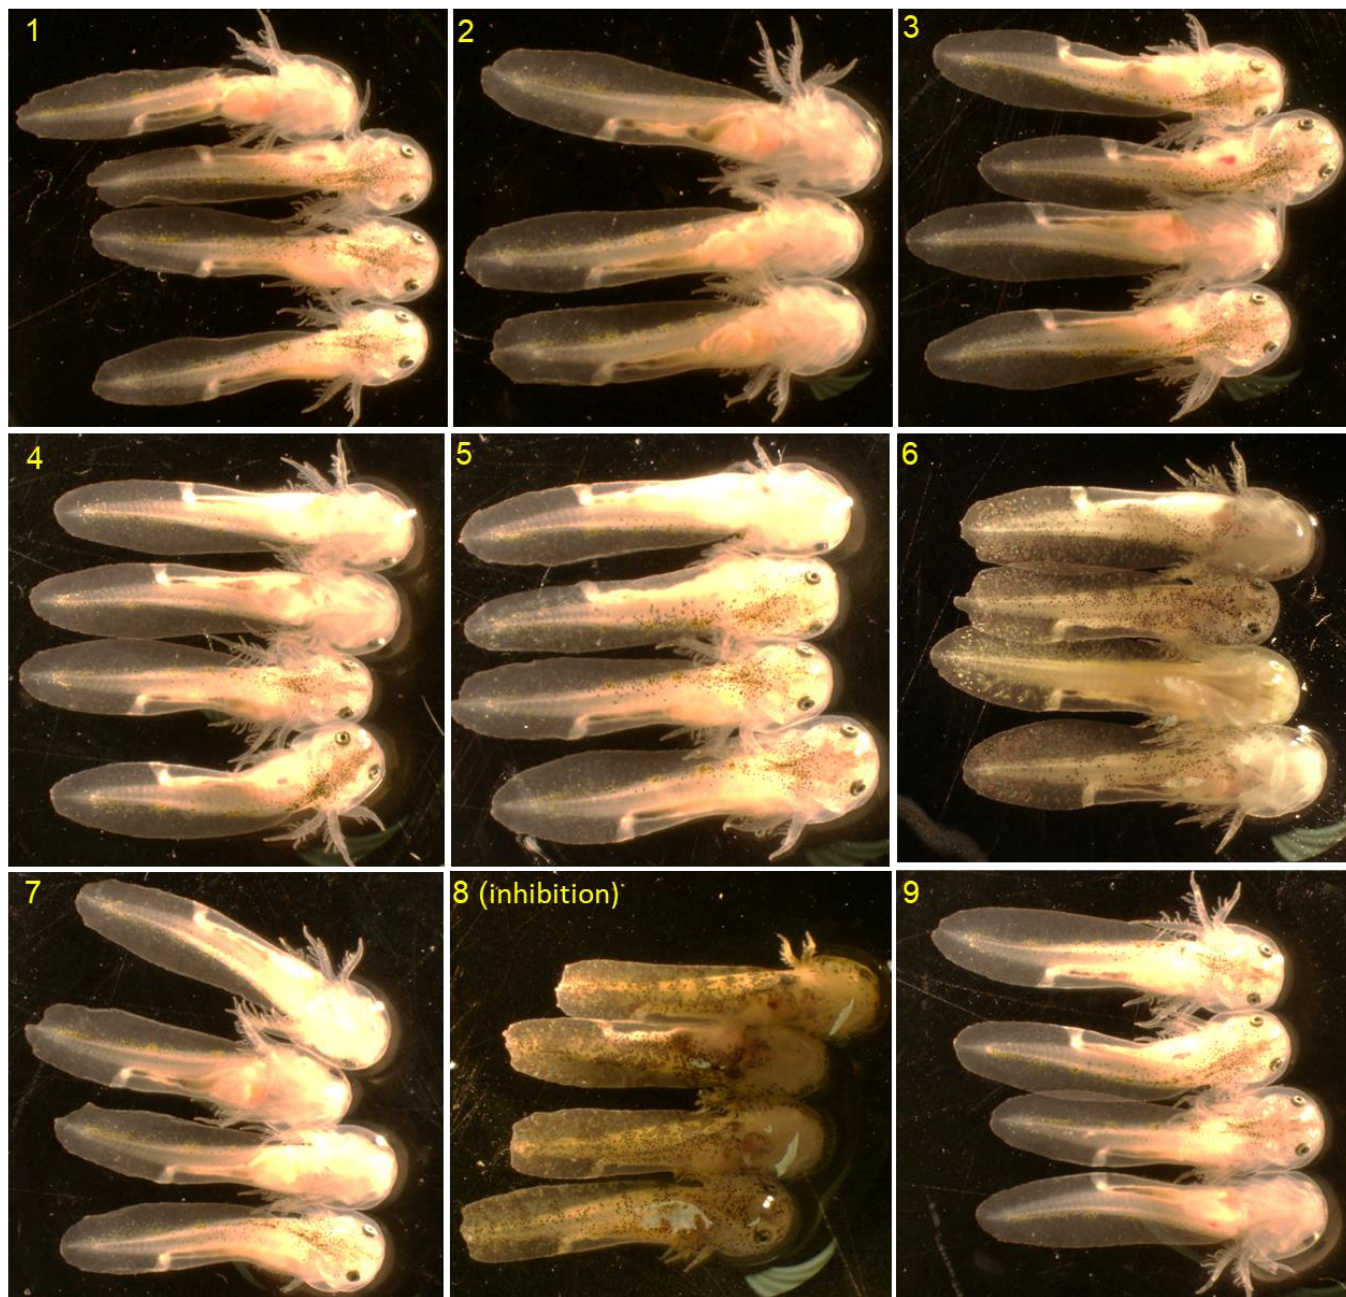

**Figure S3.** Single dose ETR assay of compounds 1-9 at 1  $\mu$ M concentration. Control 0.1% DMSO showed no effect on regeneration (See manuscript file, figure 4).

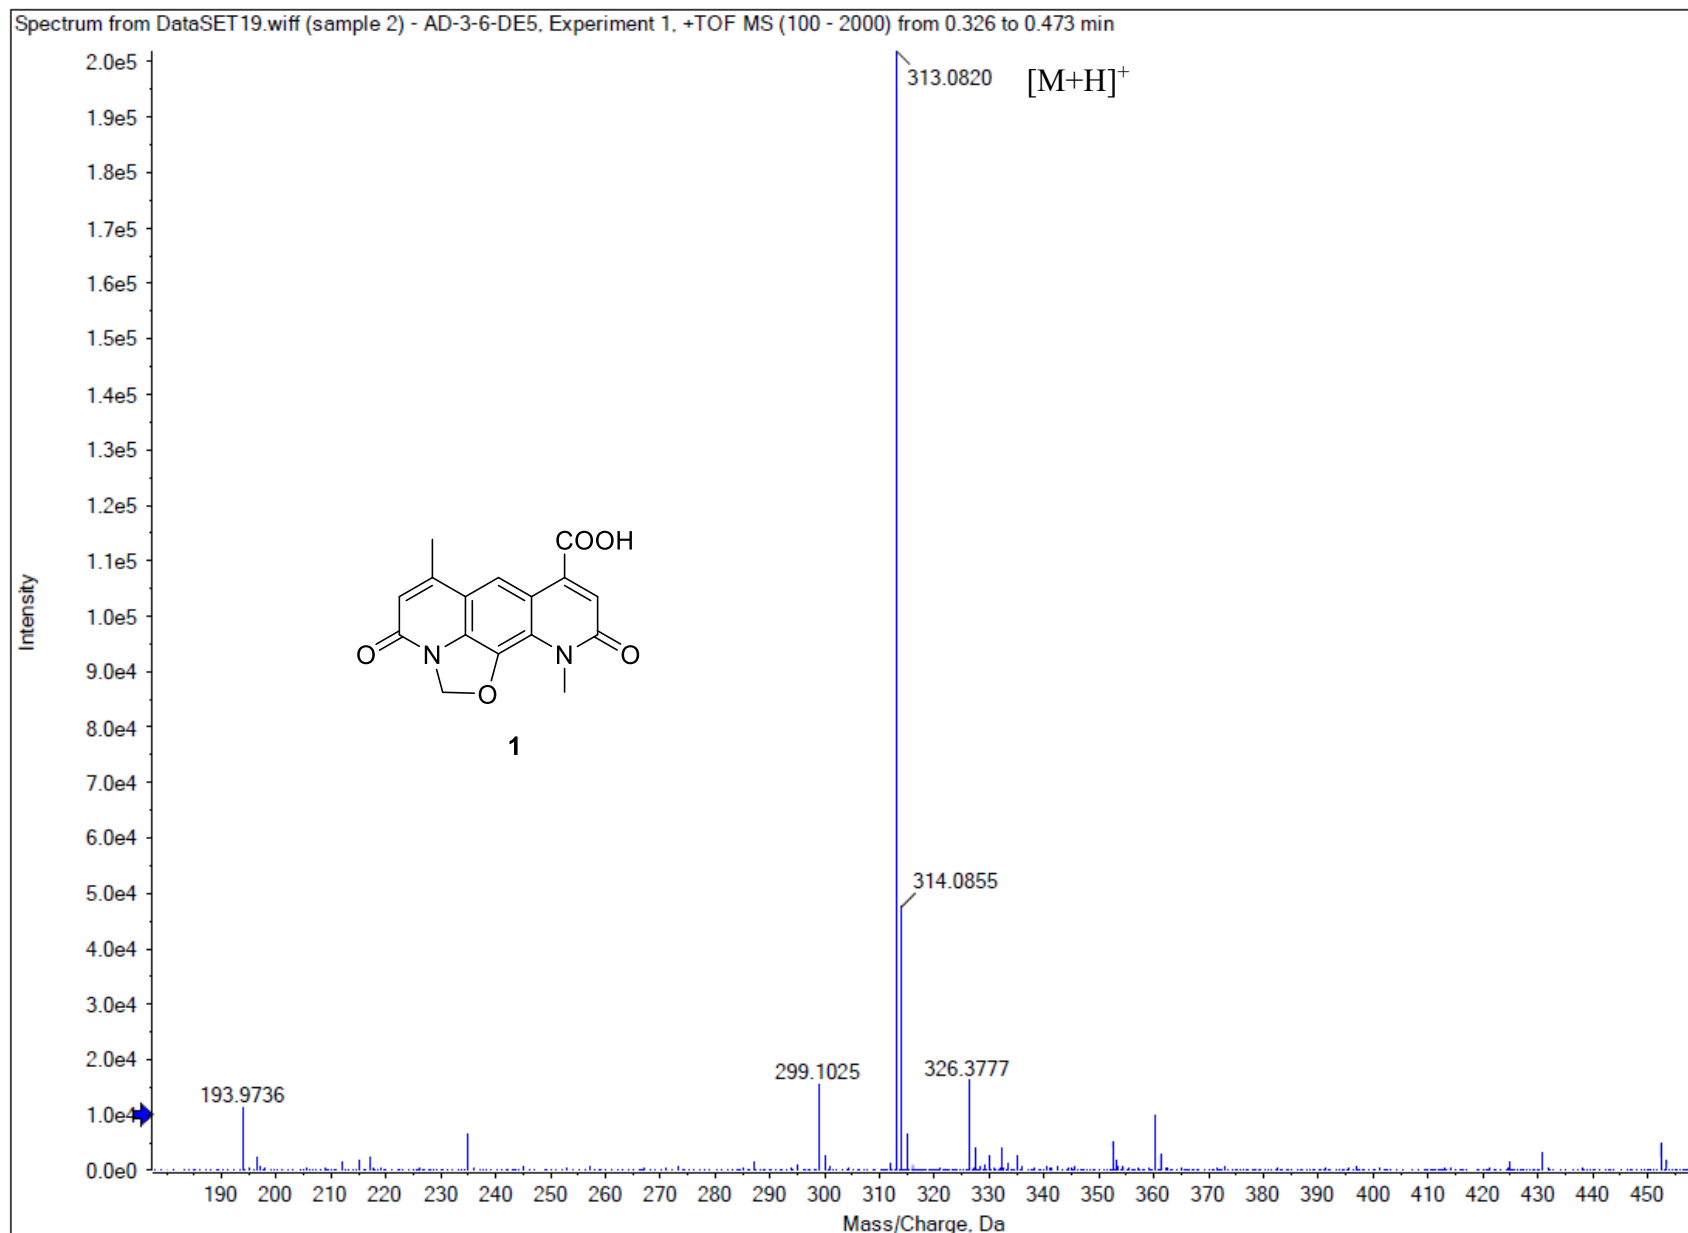

**Figure S4.** (+)-HRESIMS of nybomycin B (**1**)

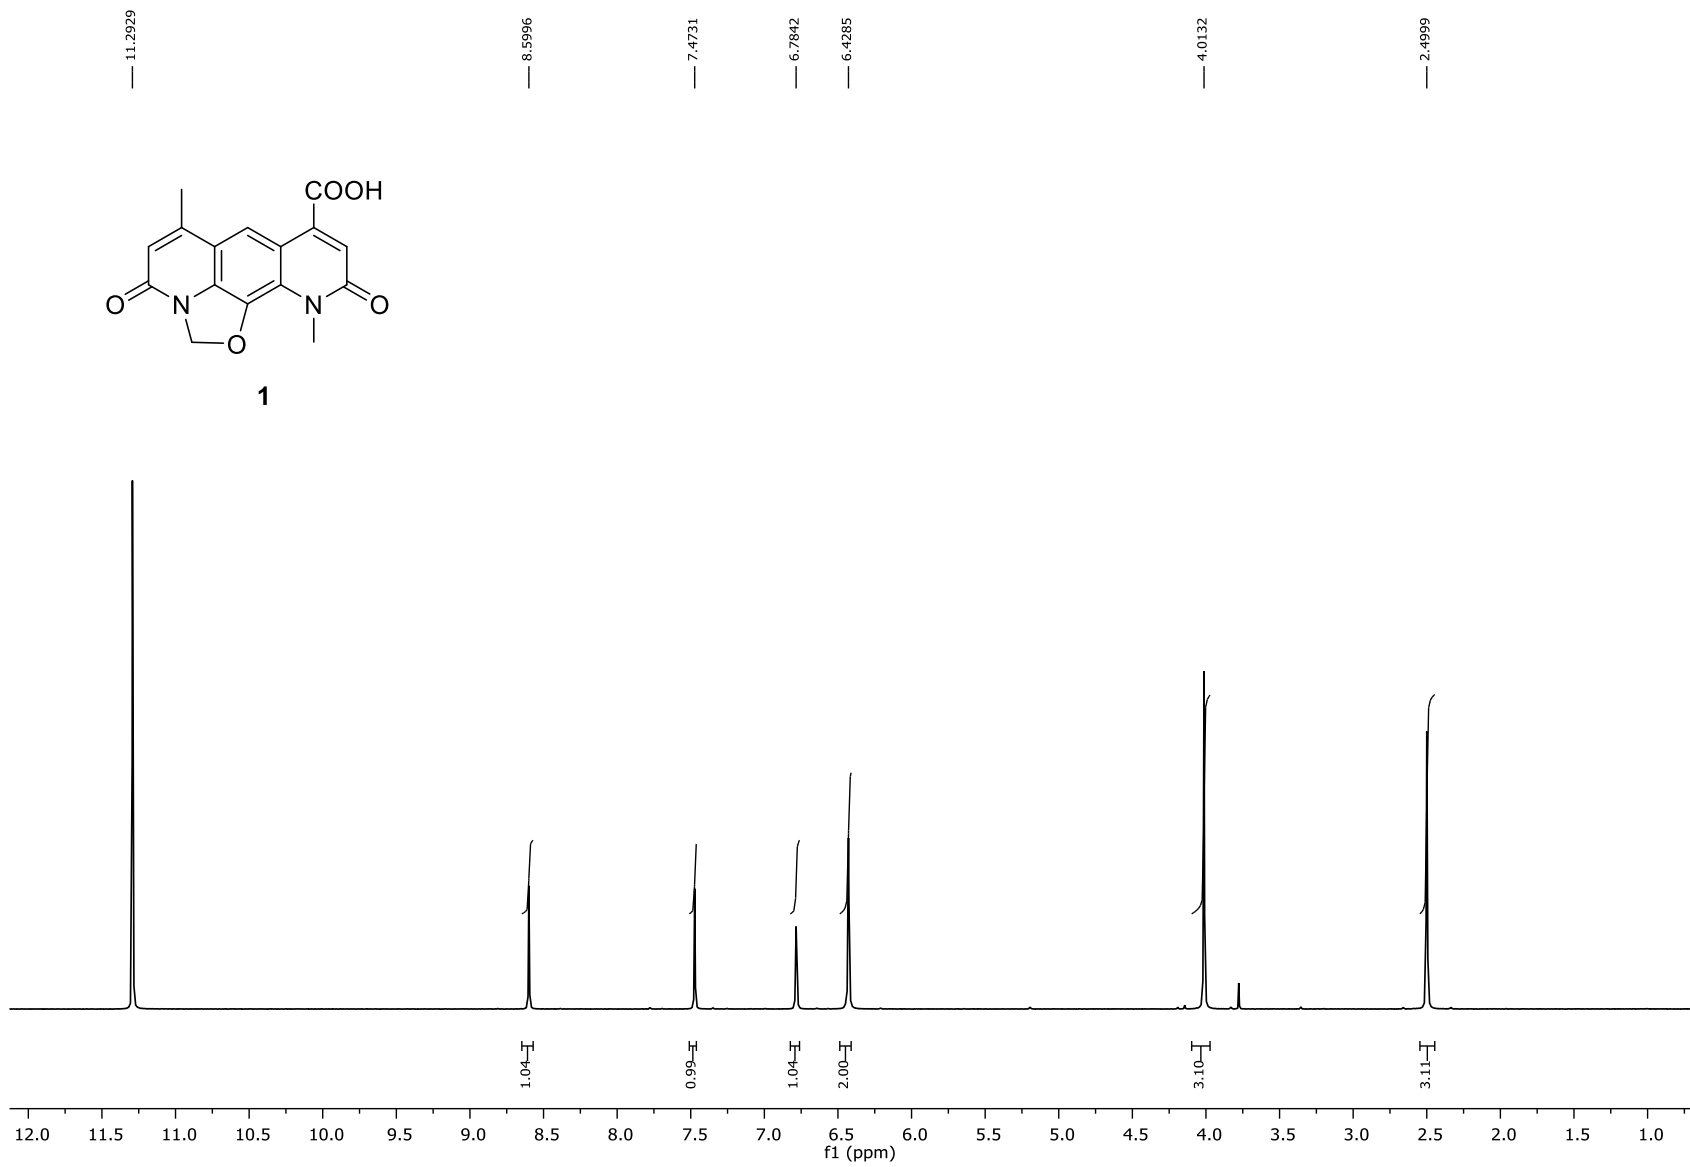

**Figure S5.** <sup>1</sup>H-NMR (CF<sub>3</sub>COOD, 400 MHz) of nybomycin B (1)

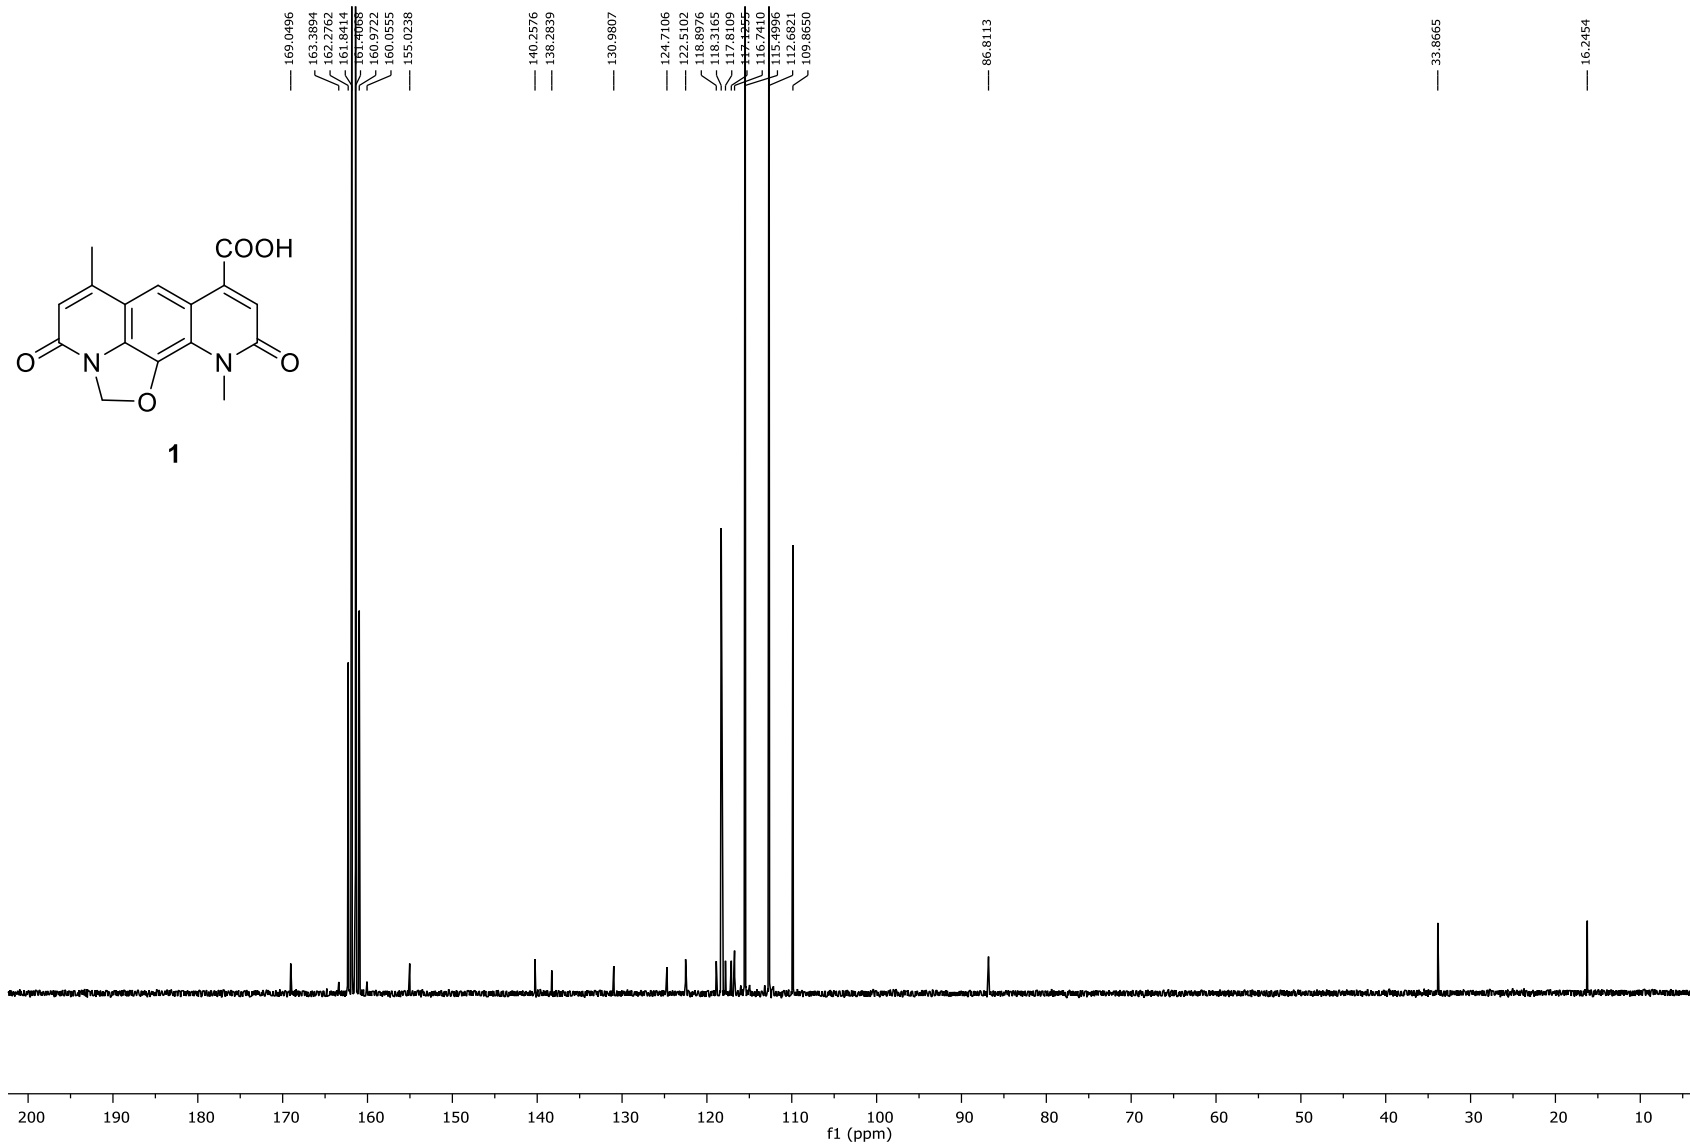

Figure S6.  $^{13}\text{C-NMR}$  (CF<sub>3</sub>COOD, 100 MHz) of nybomycin B (1)

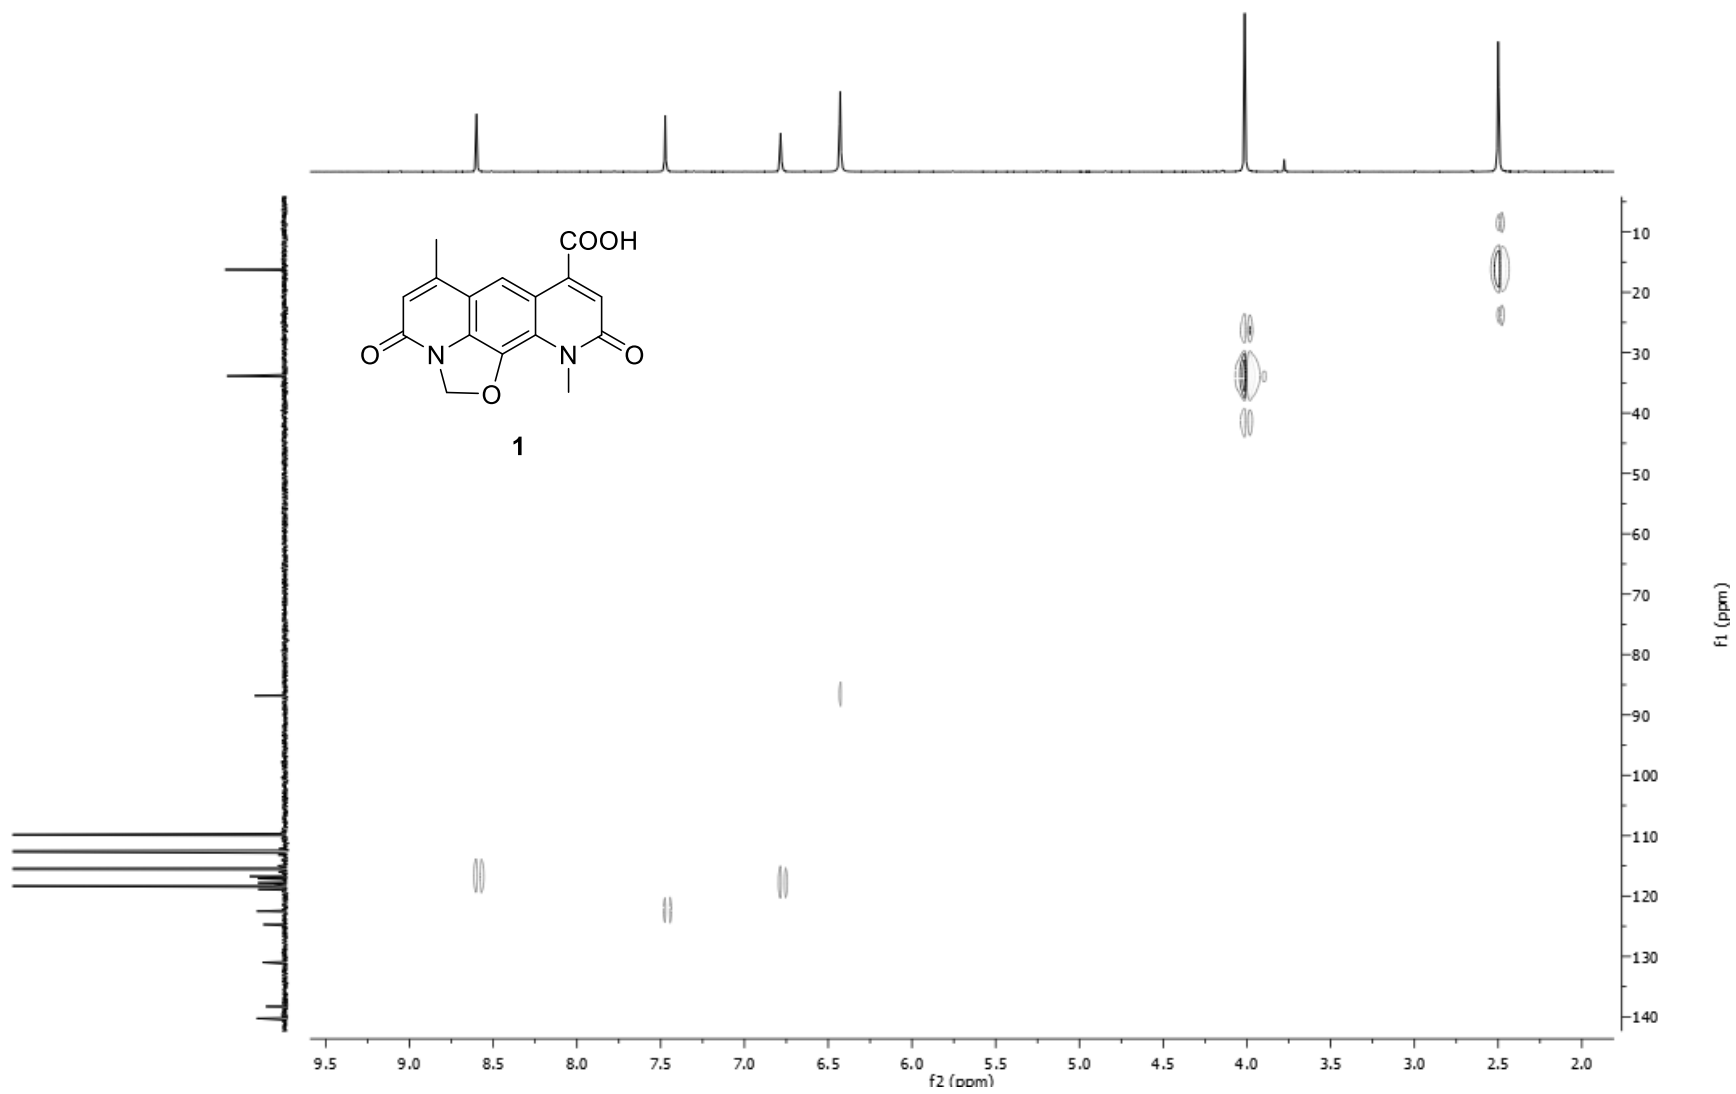

**Figure S7.** HSQC spectrum (CF<sub>3</sub>COOD, 400 MHz) of nybomycin B (1)



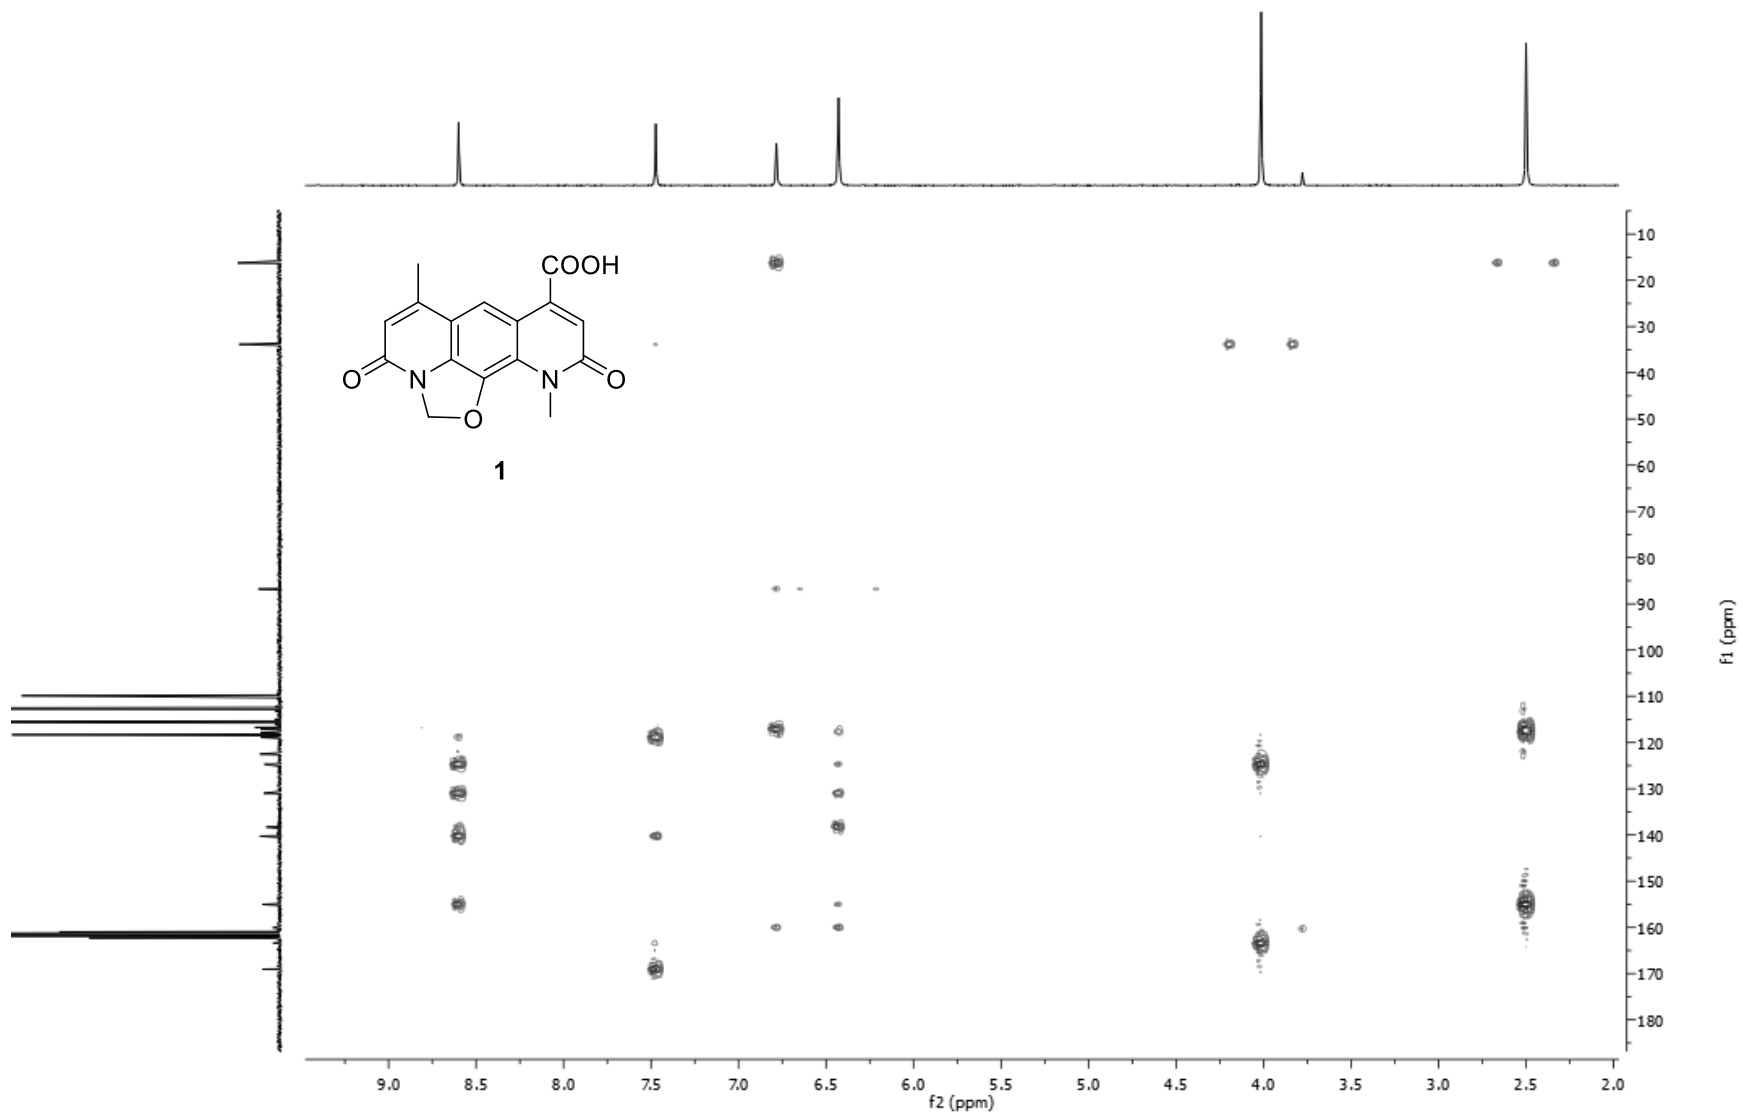

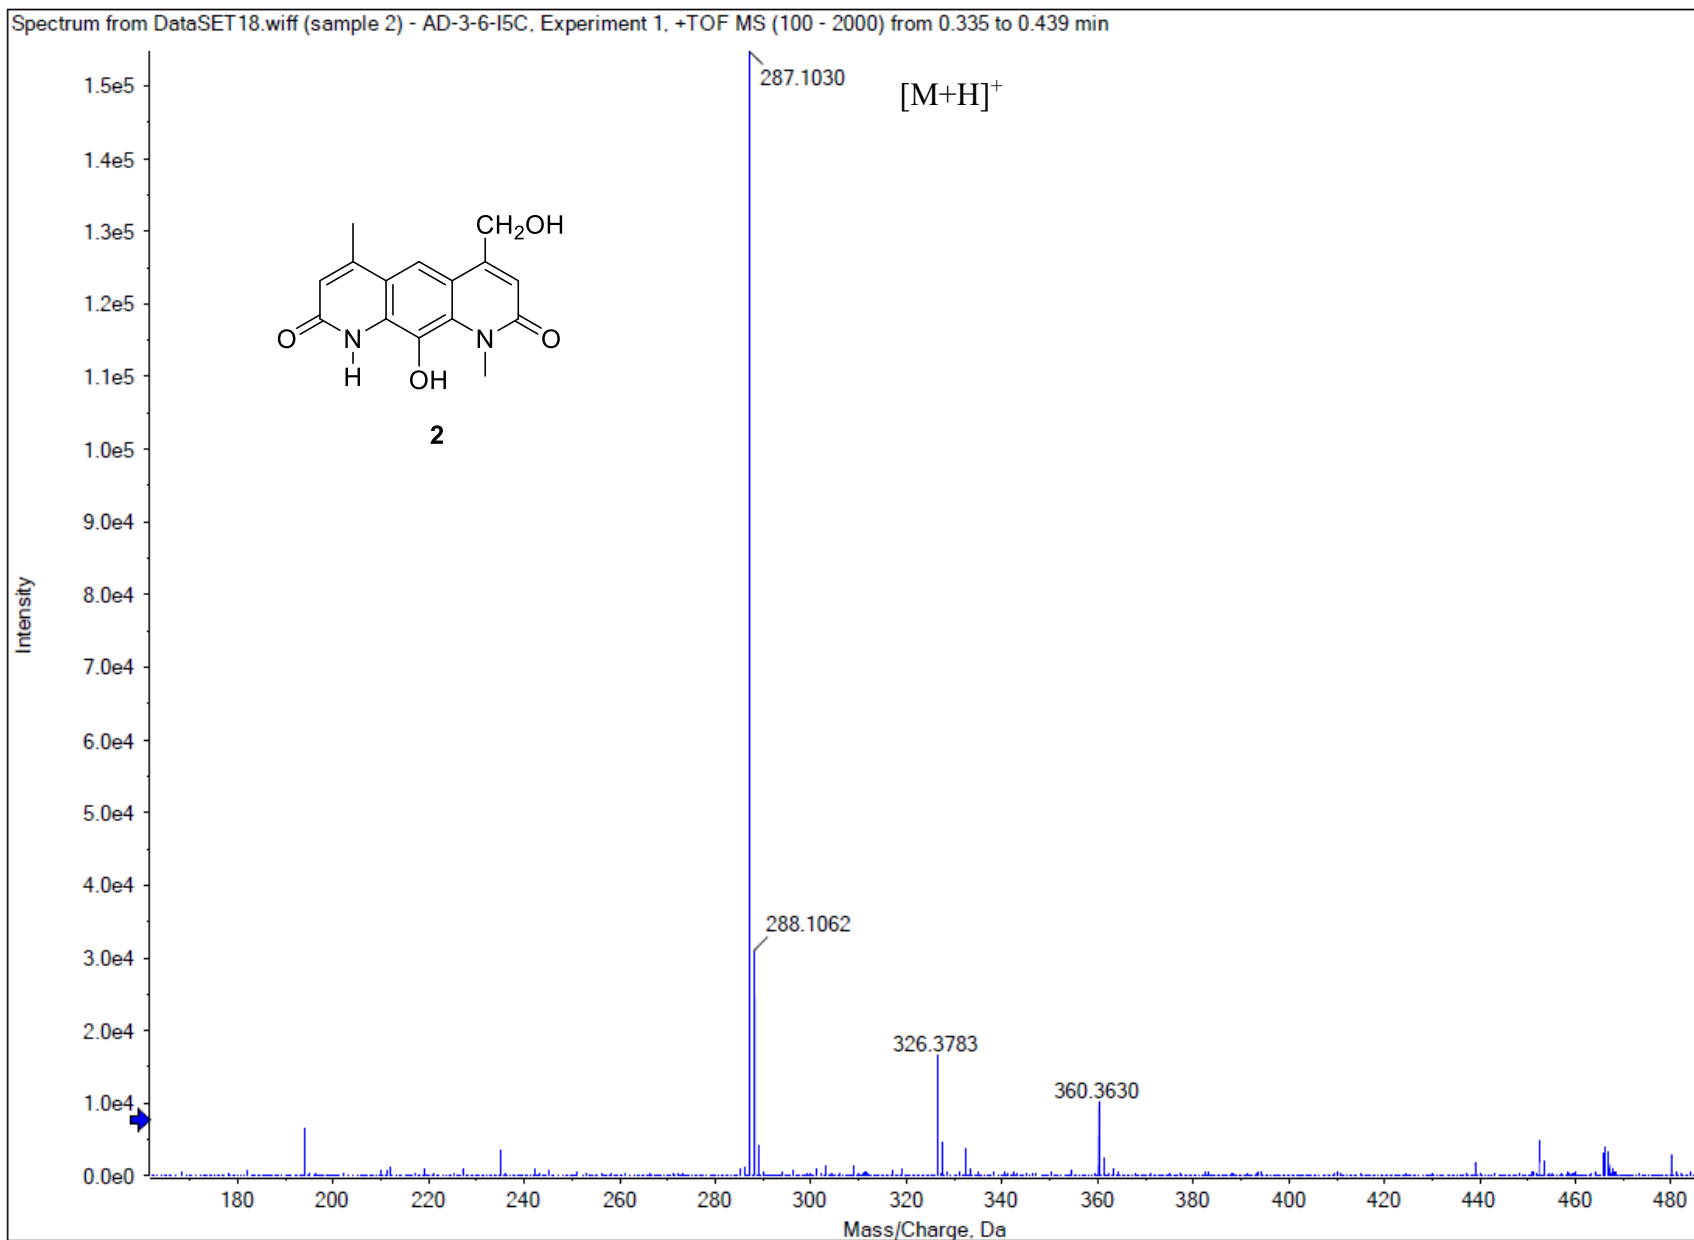

Figure S9. (+)-HRESIMS of nybomycin C (2)

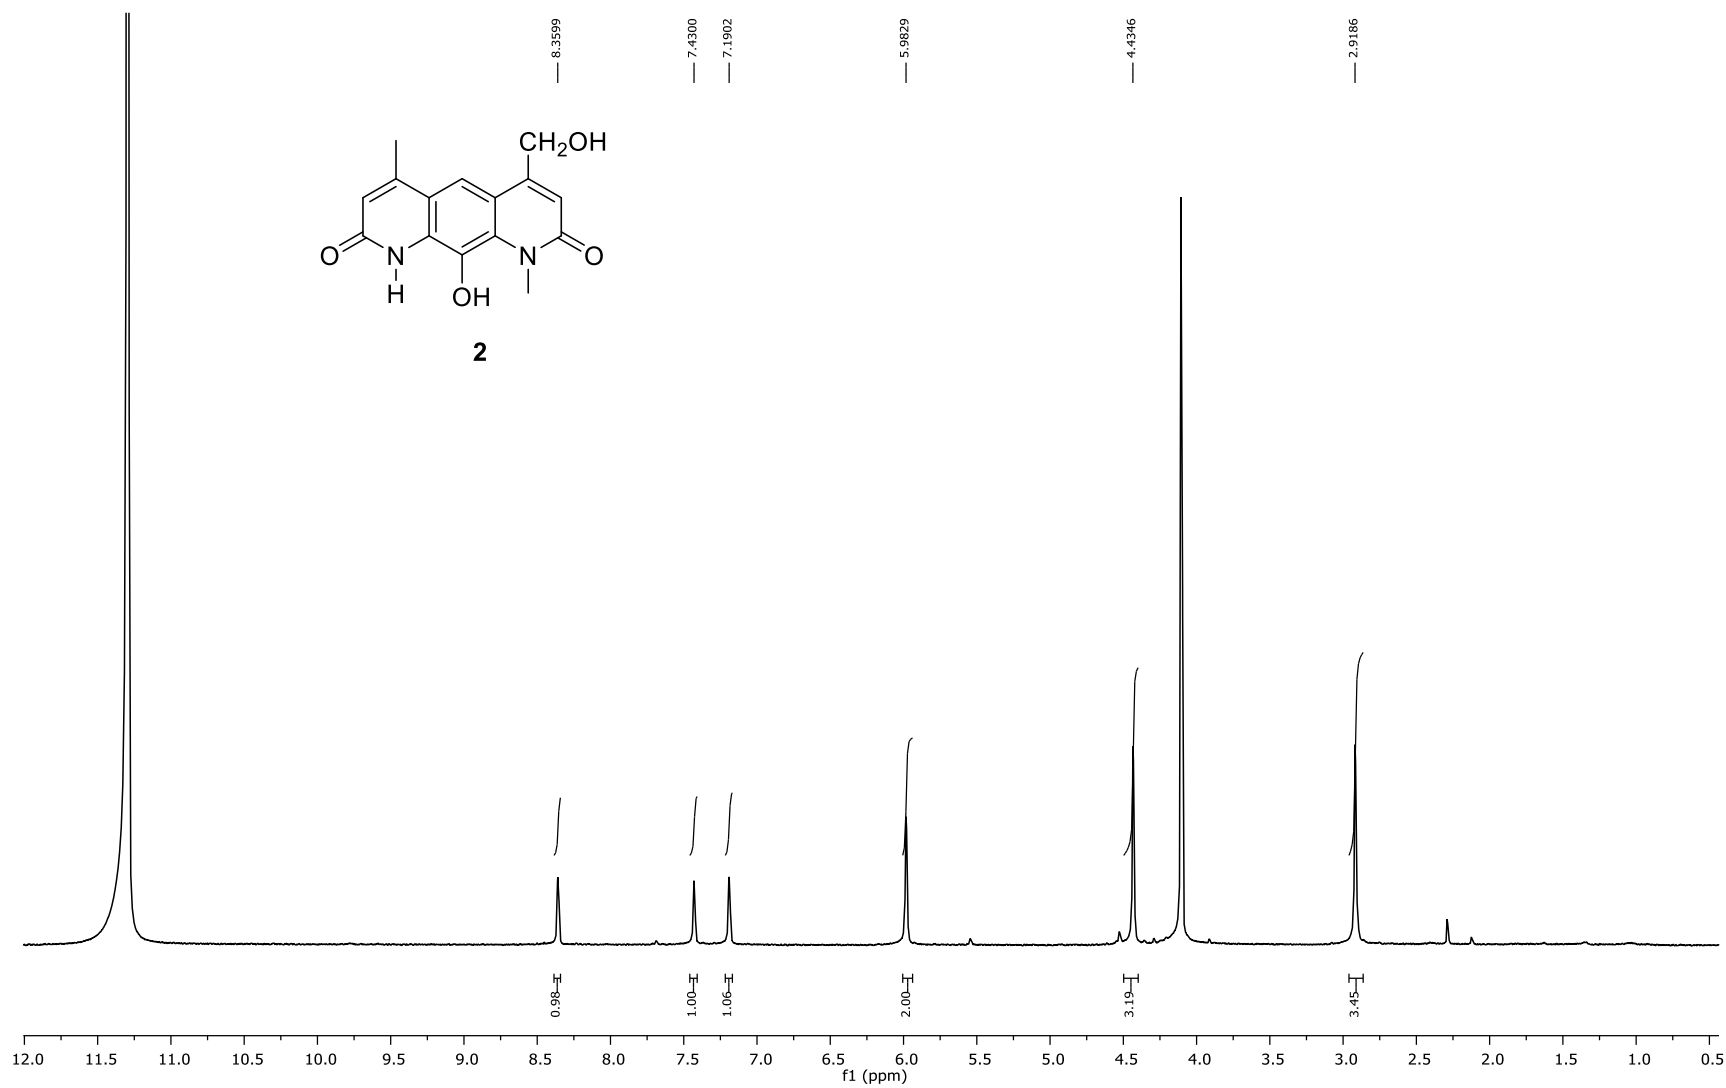

Figure S10. <sup>1</sup>H-NMR (CF<sub>3</sub>COOD, 400 MHz) of nybomycin C (2)

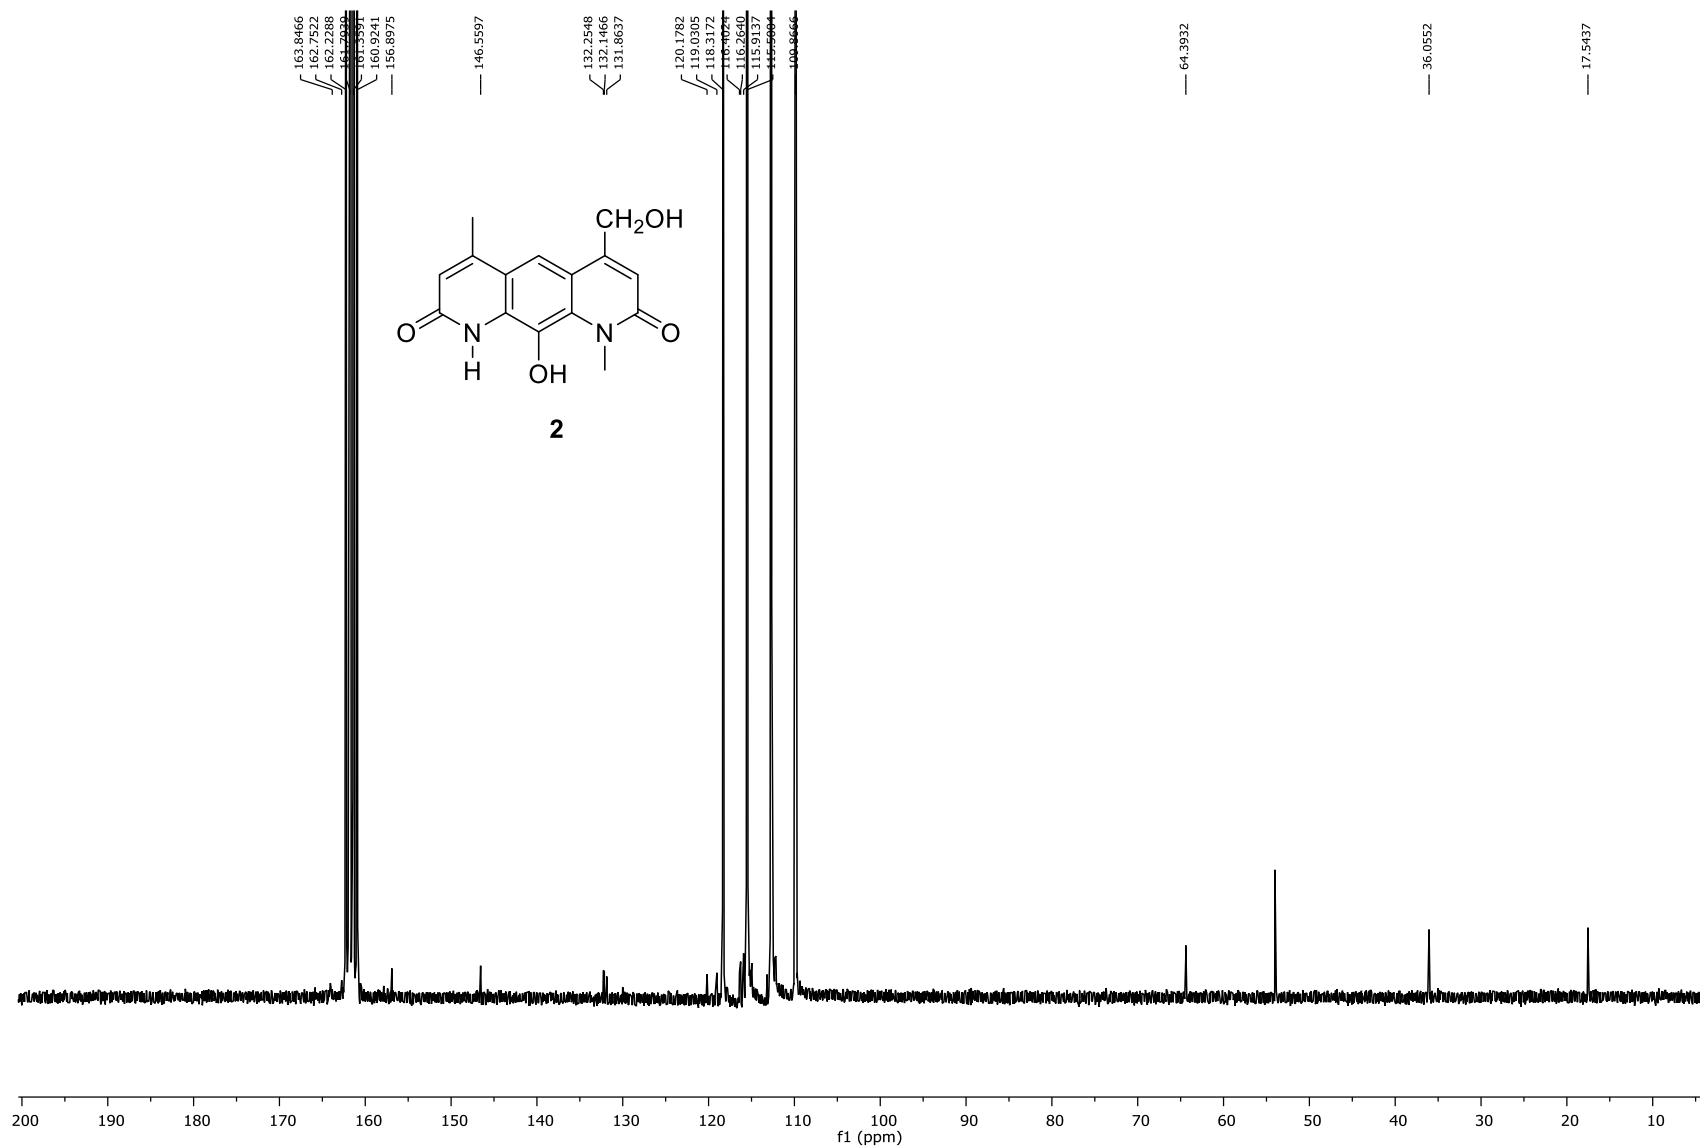

Figure S11. <sup>13</sup>C-NMR (CF<sub>3</sub>COOD, 100 MHz) of nybomycin C (2)

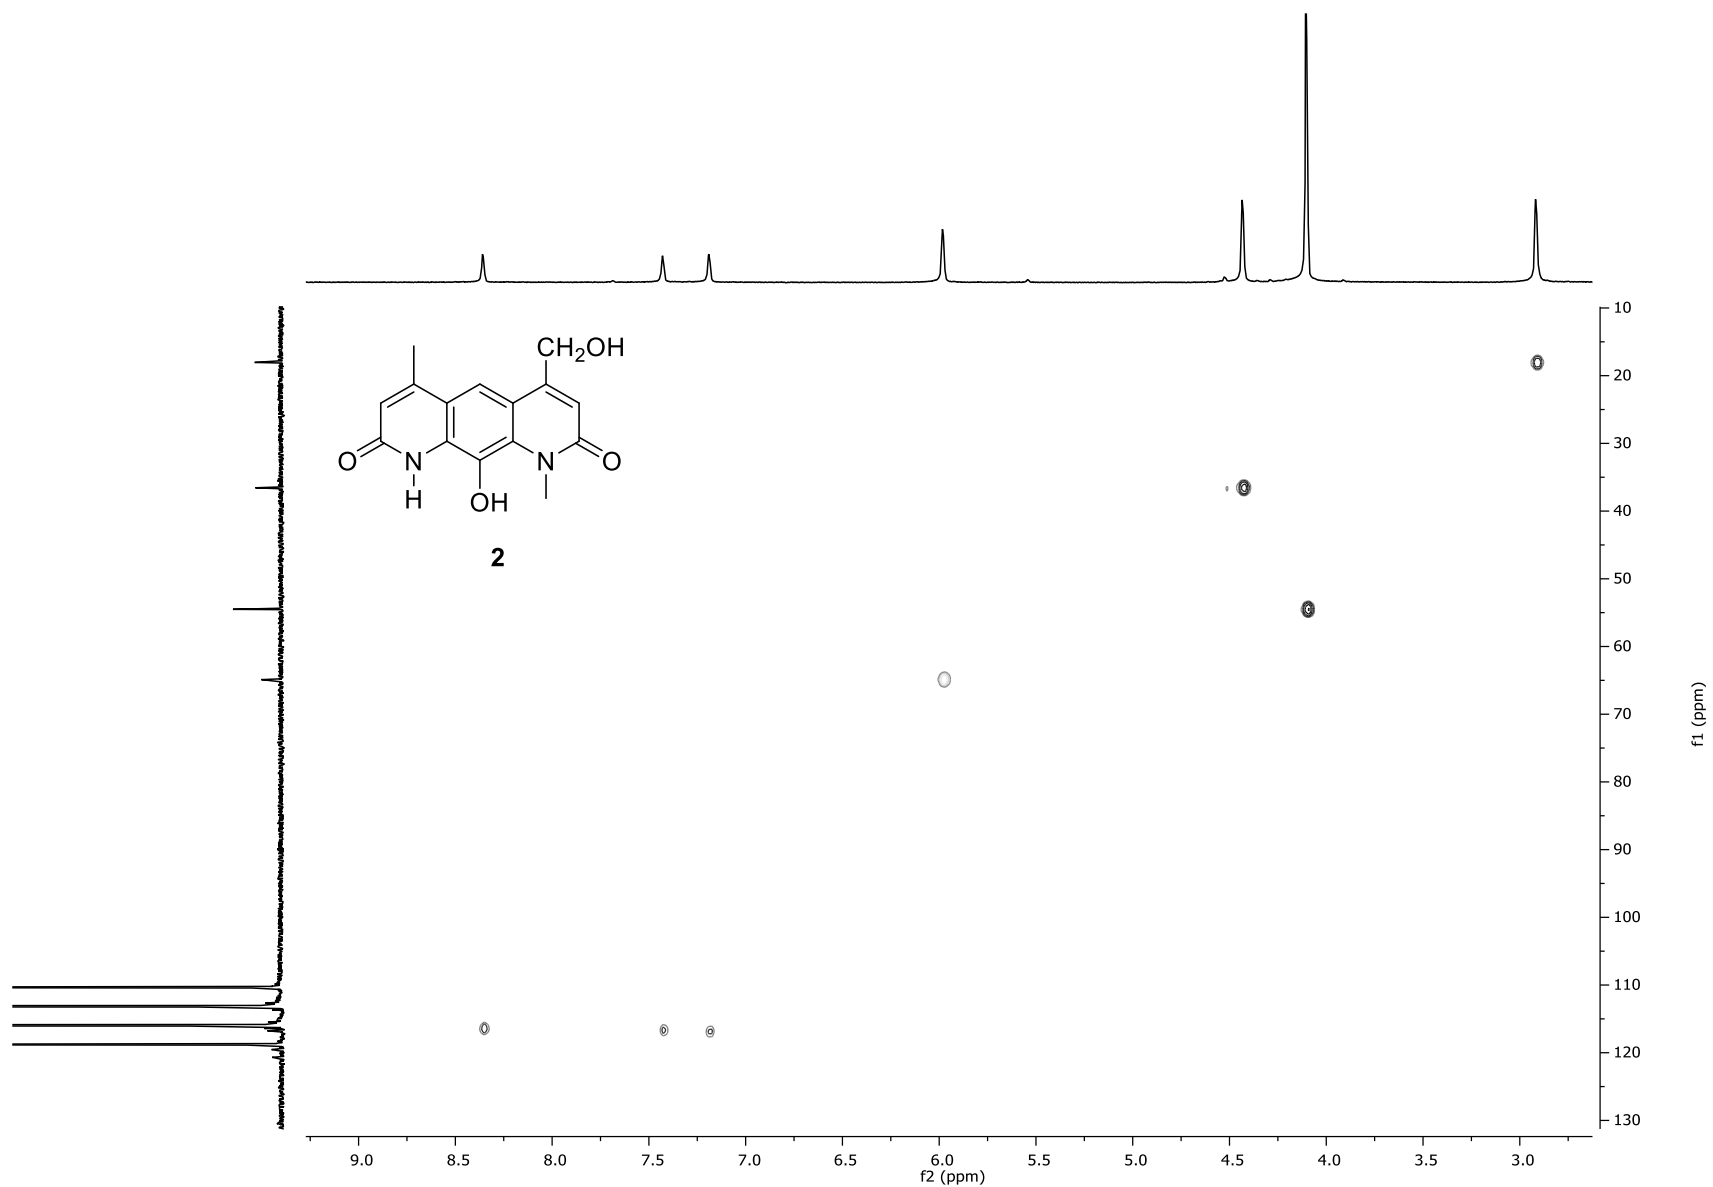

**Figure S12.** HSQC spectrum (CF<sub>3</sub>COOD, 400 MHz) of nybomycin C (**2**)

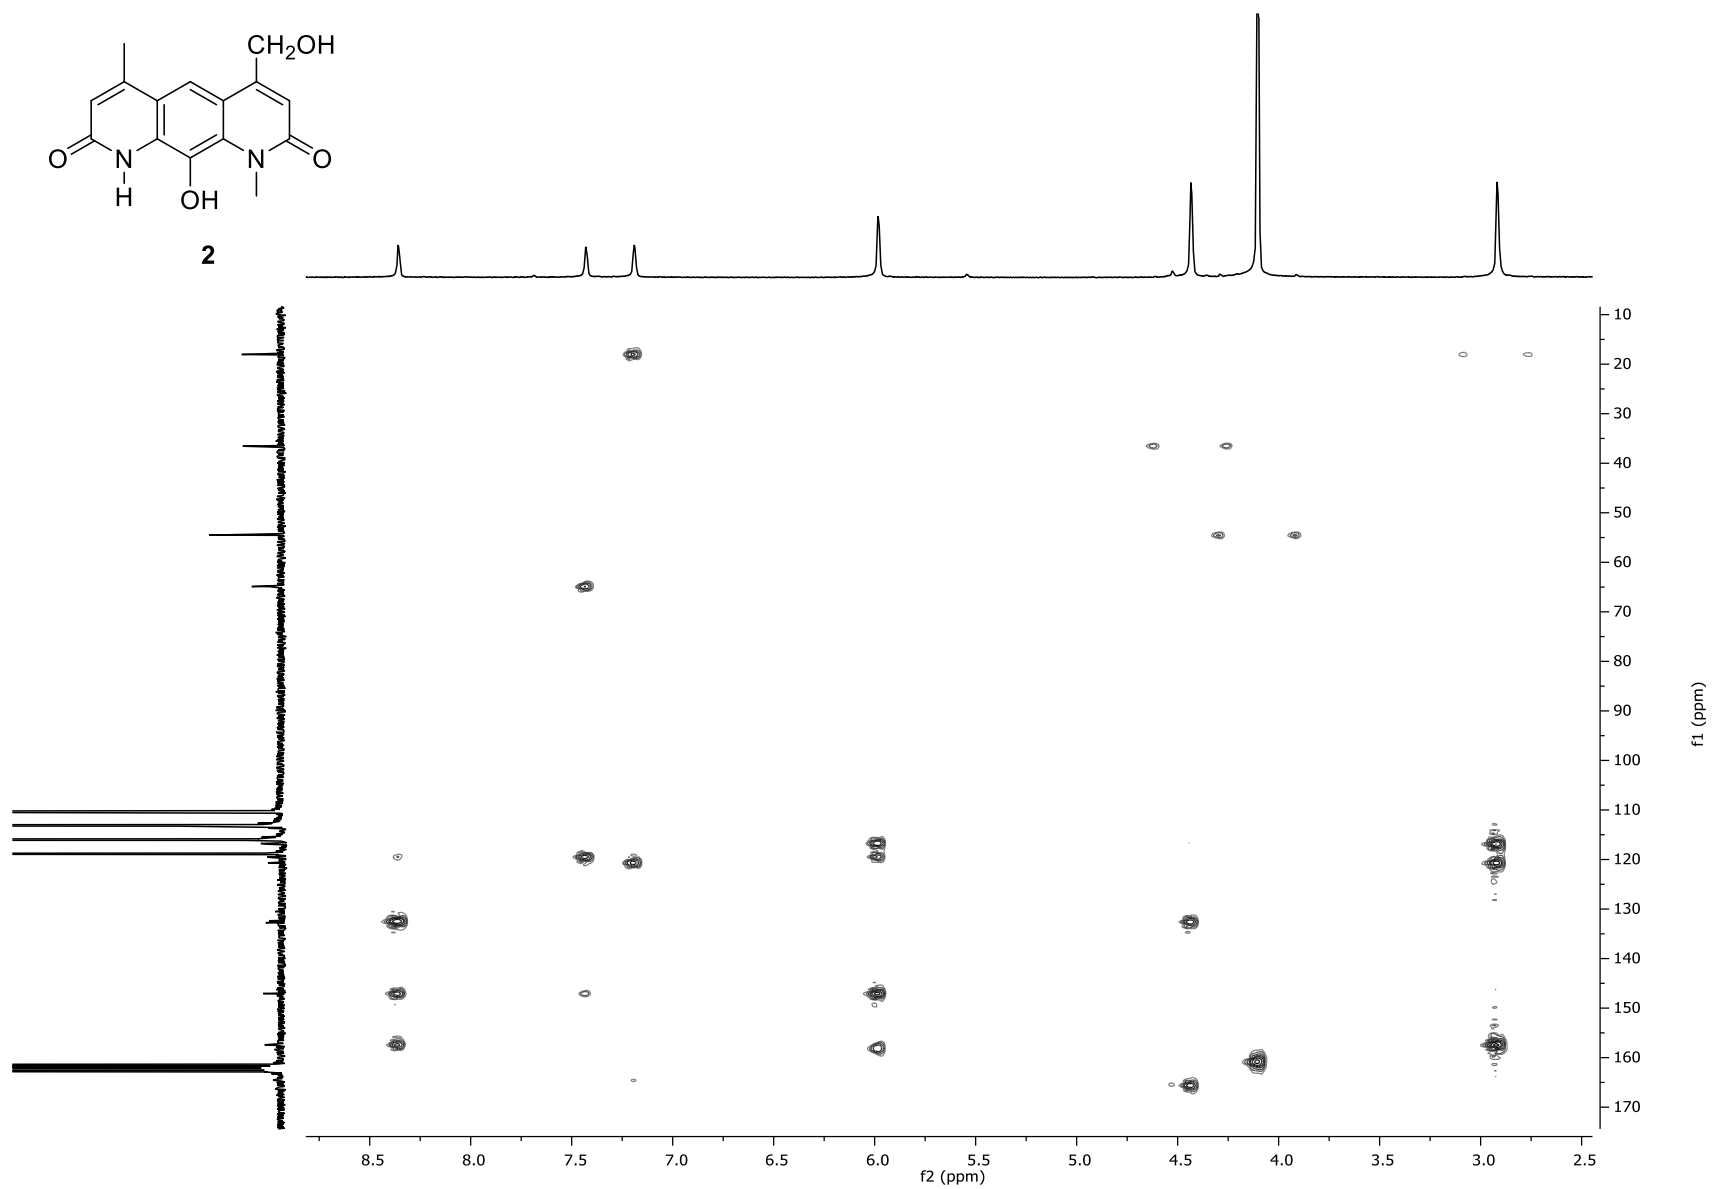

**Figure S13.** HMBC spectrum (CF<sub>3</sub>COOD, 400 MHz) of nybomycin C (**2**)

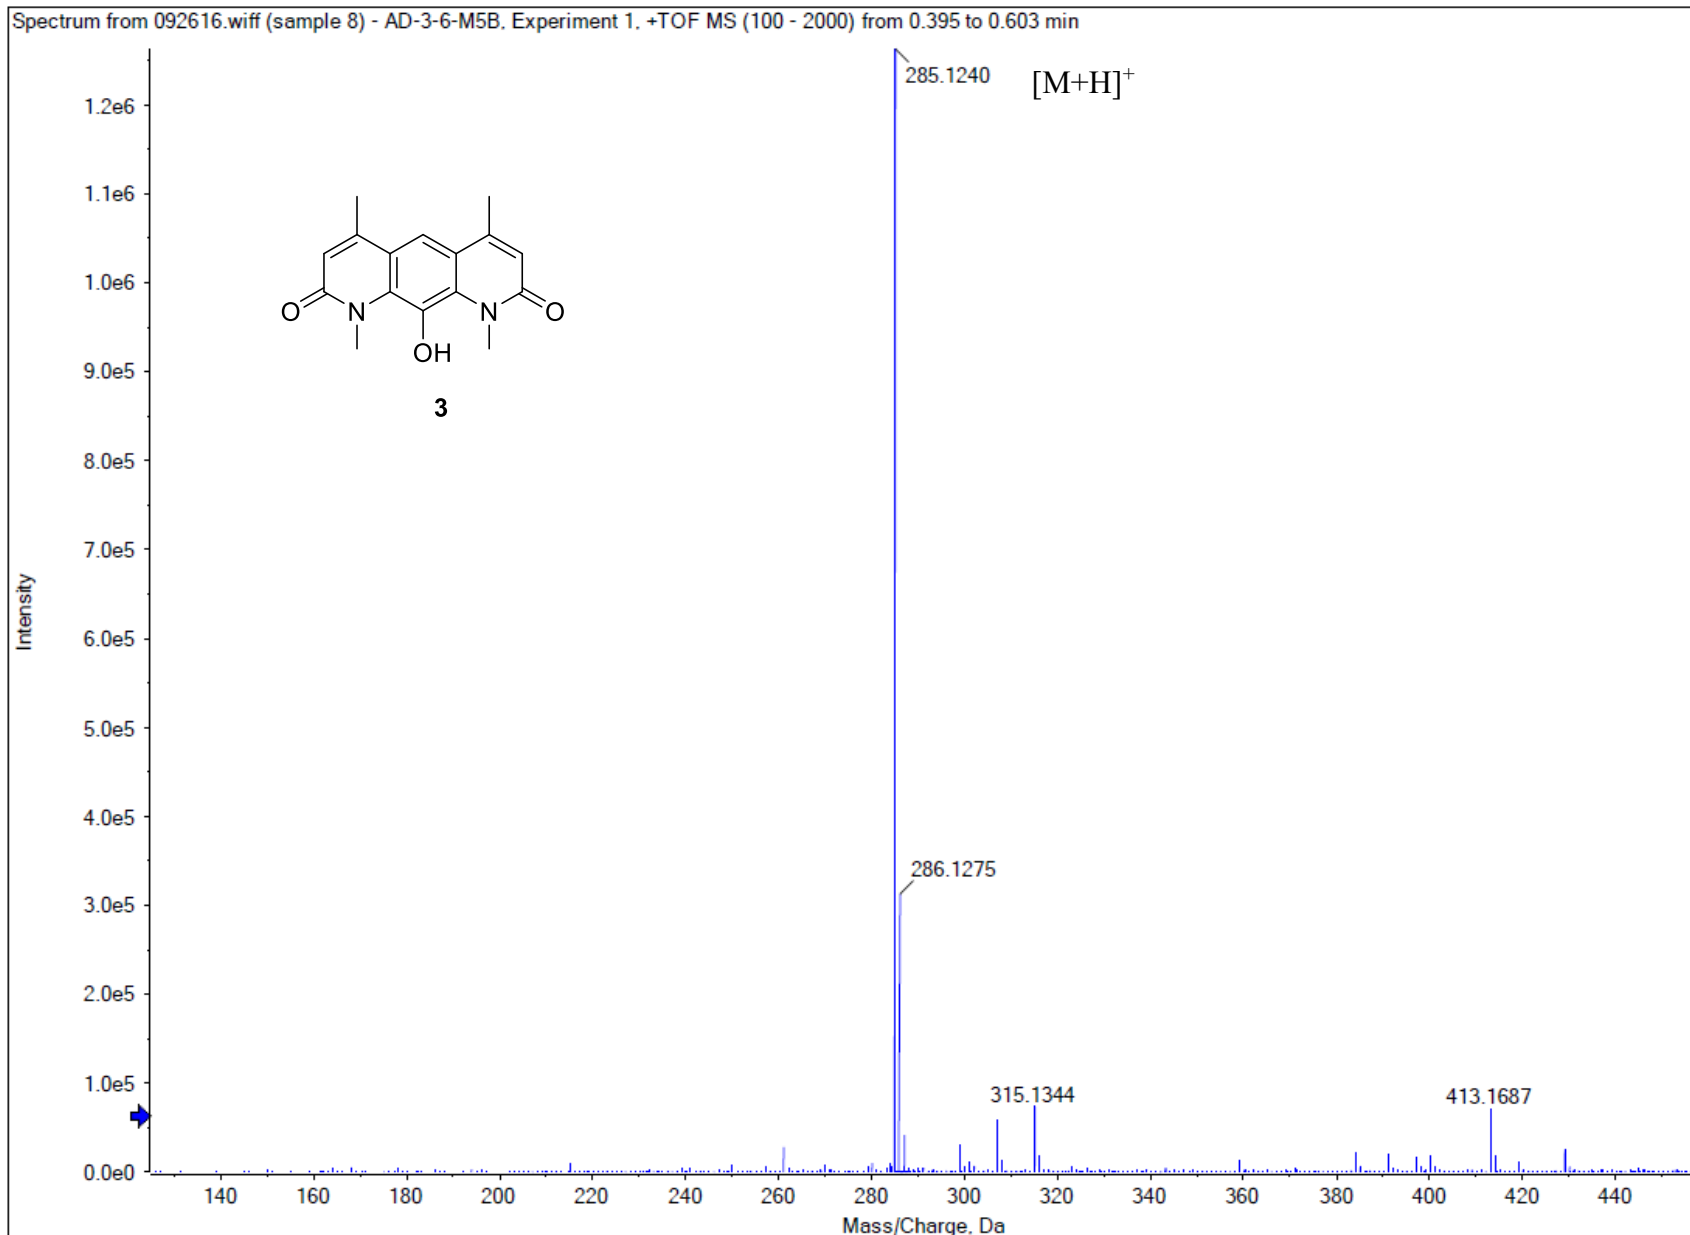

Figure S14. (+)-HRESIMS of nybomycin D (3)

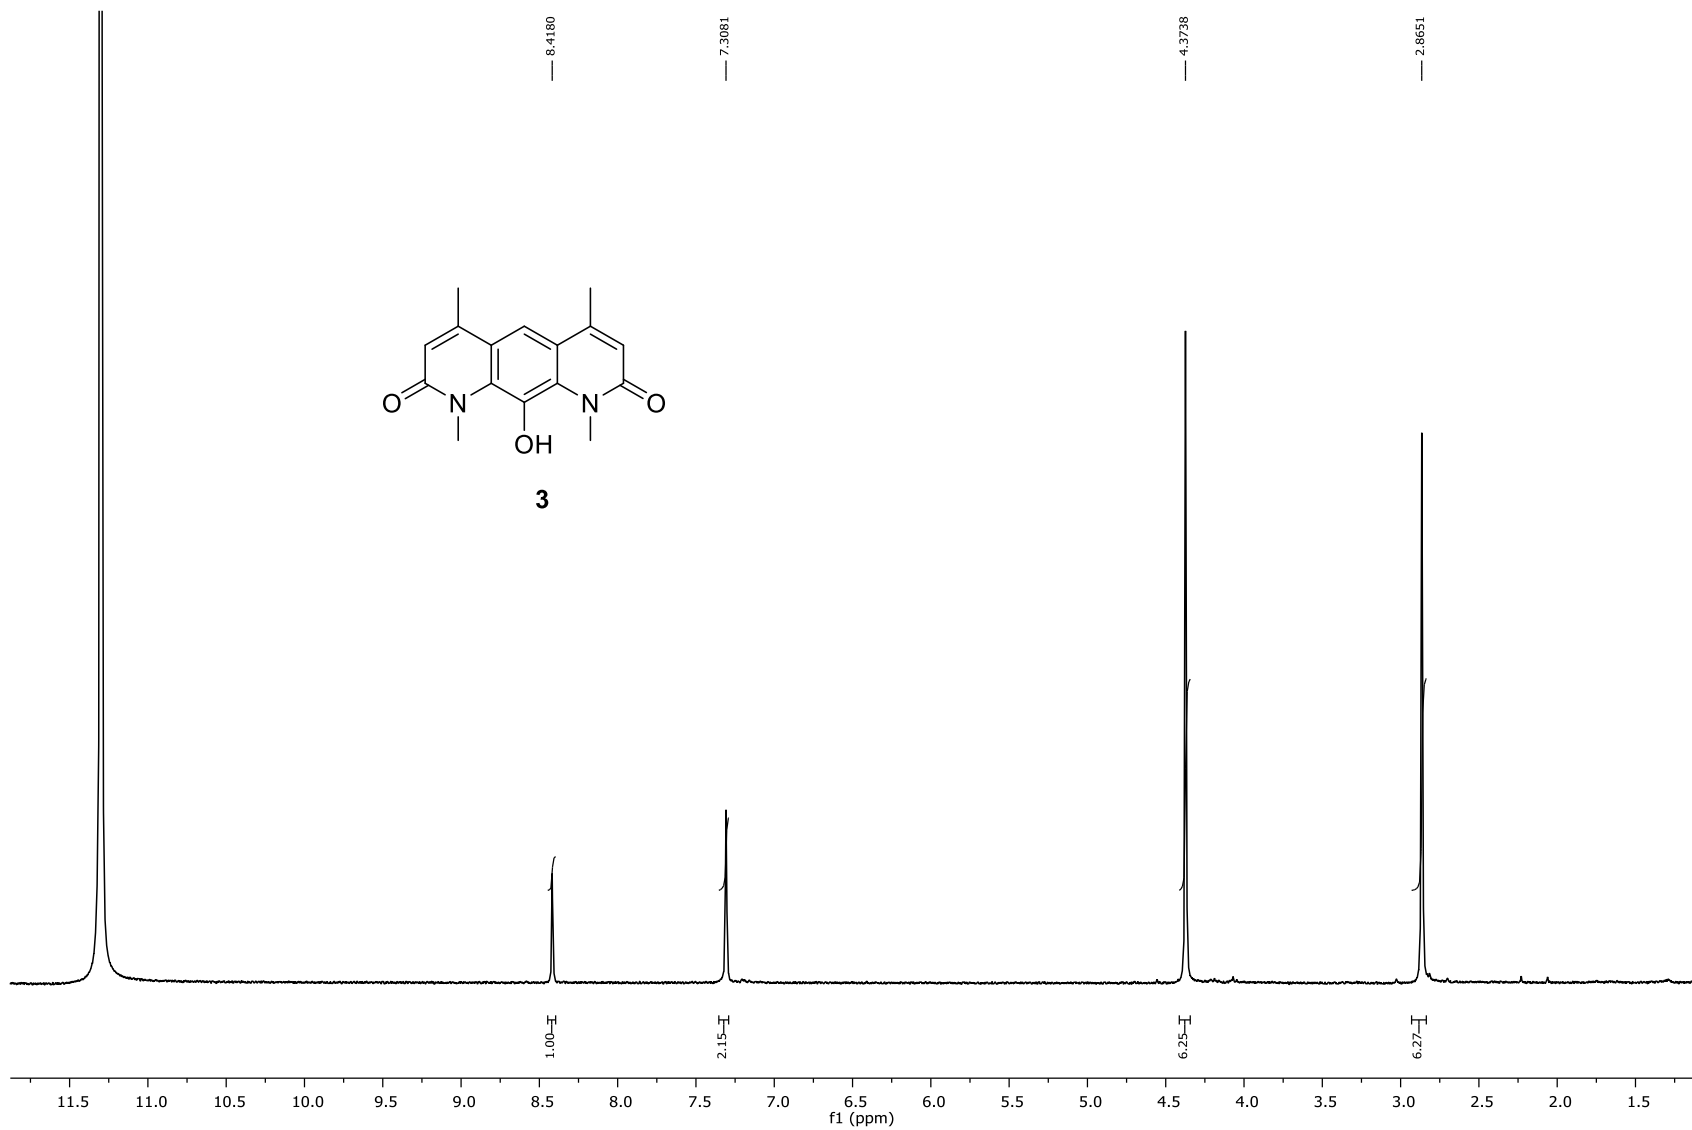

**Figure S15.** <sup>1</sup>H-NMR (CF<sub>3</sub>COOD, 400 MHz) of nybomycin D (**3**)



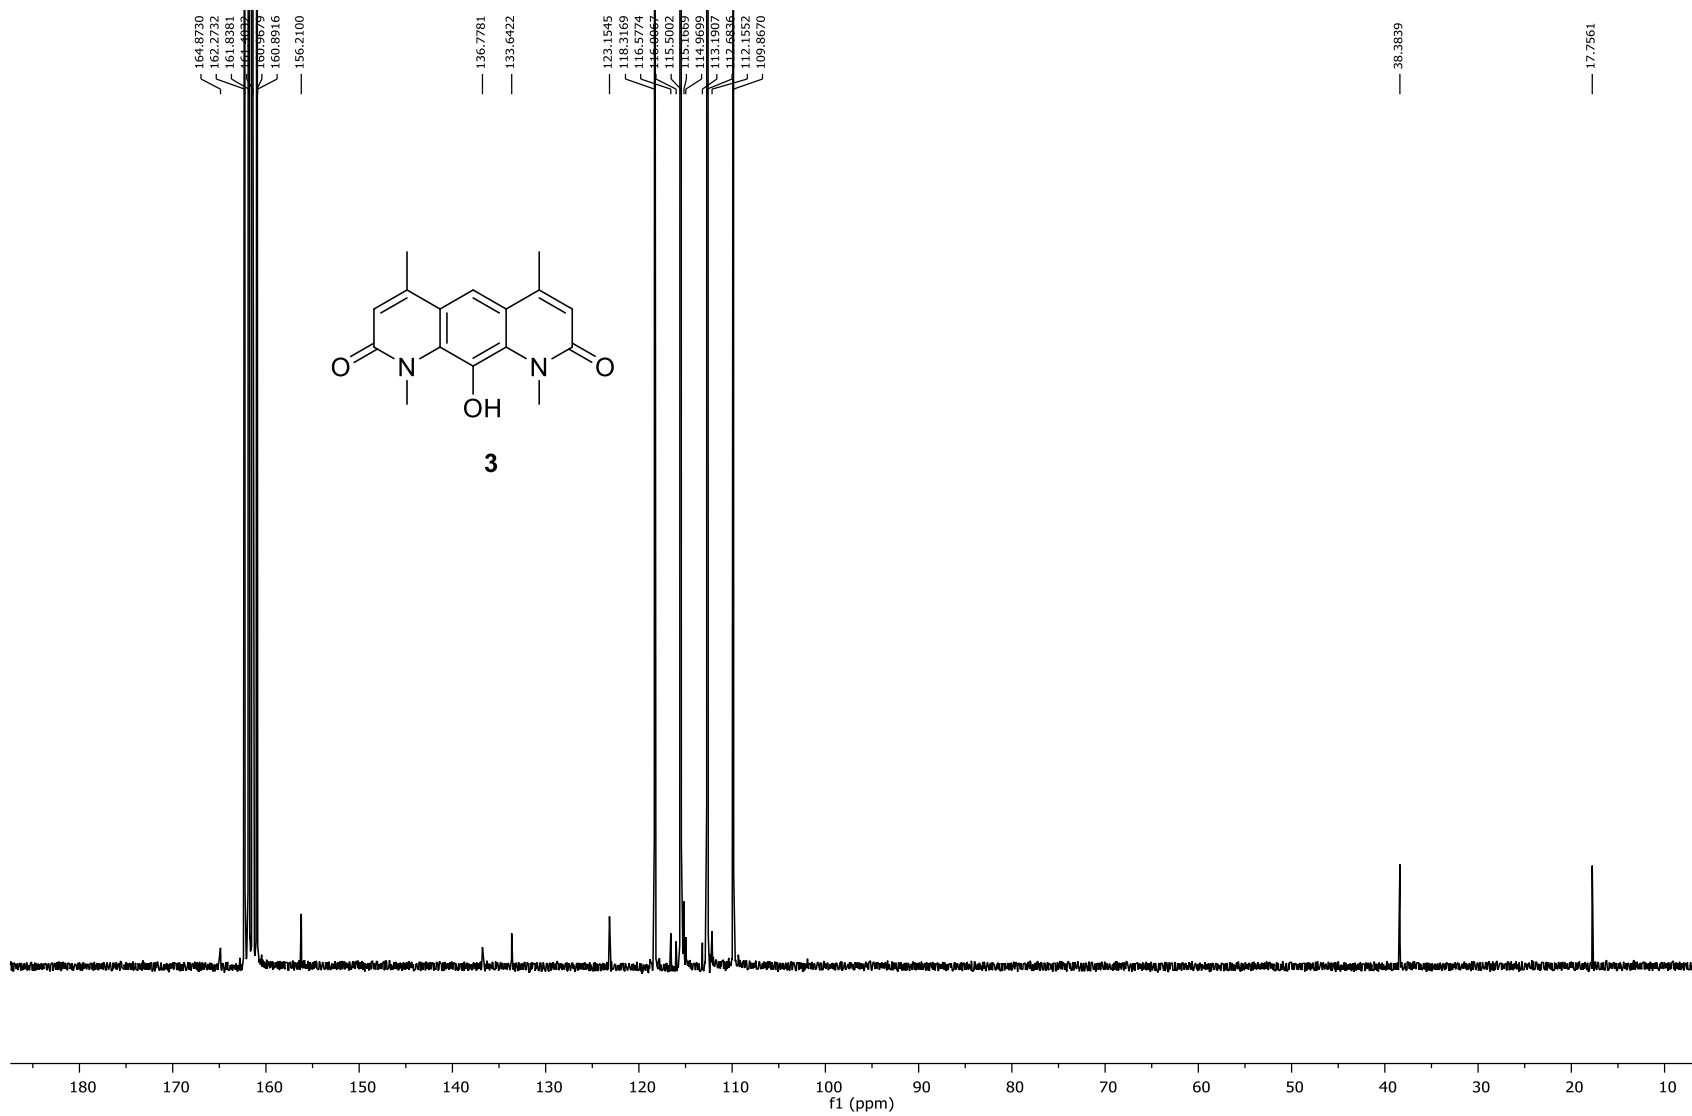

**Figure S16.**  $^{13}\text{C-NMR}$  (CF<sub>3</sub>COOD, 100 MHz) of nybomycin D (3)

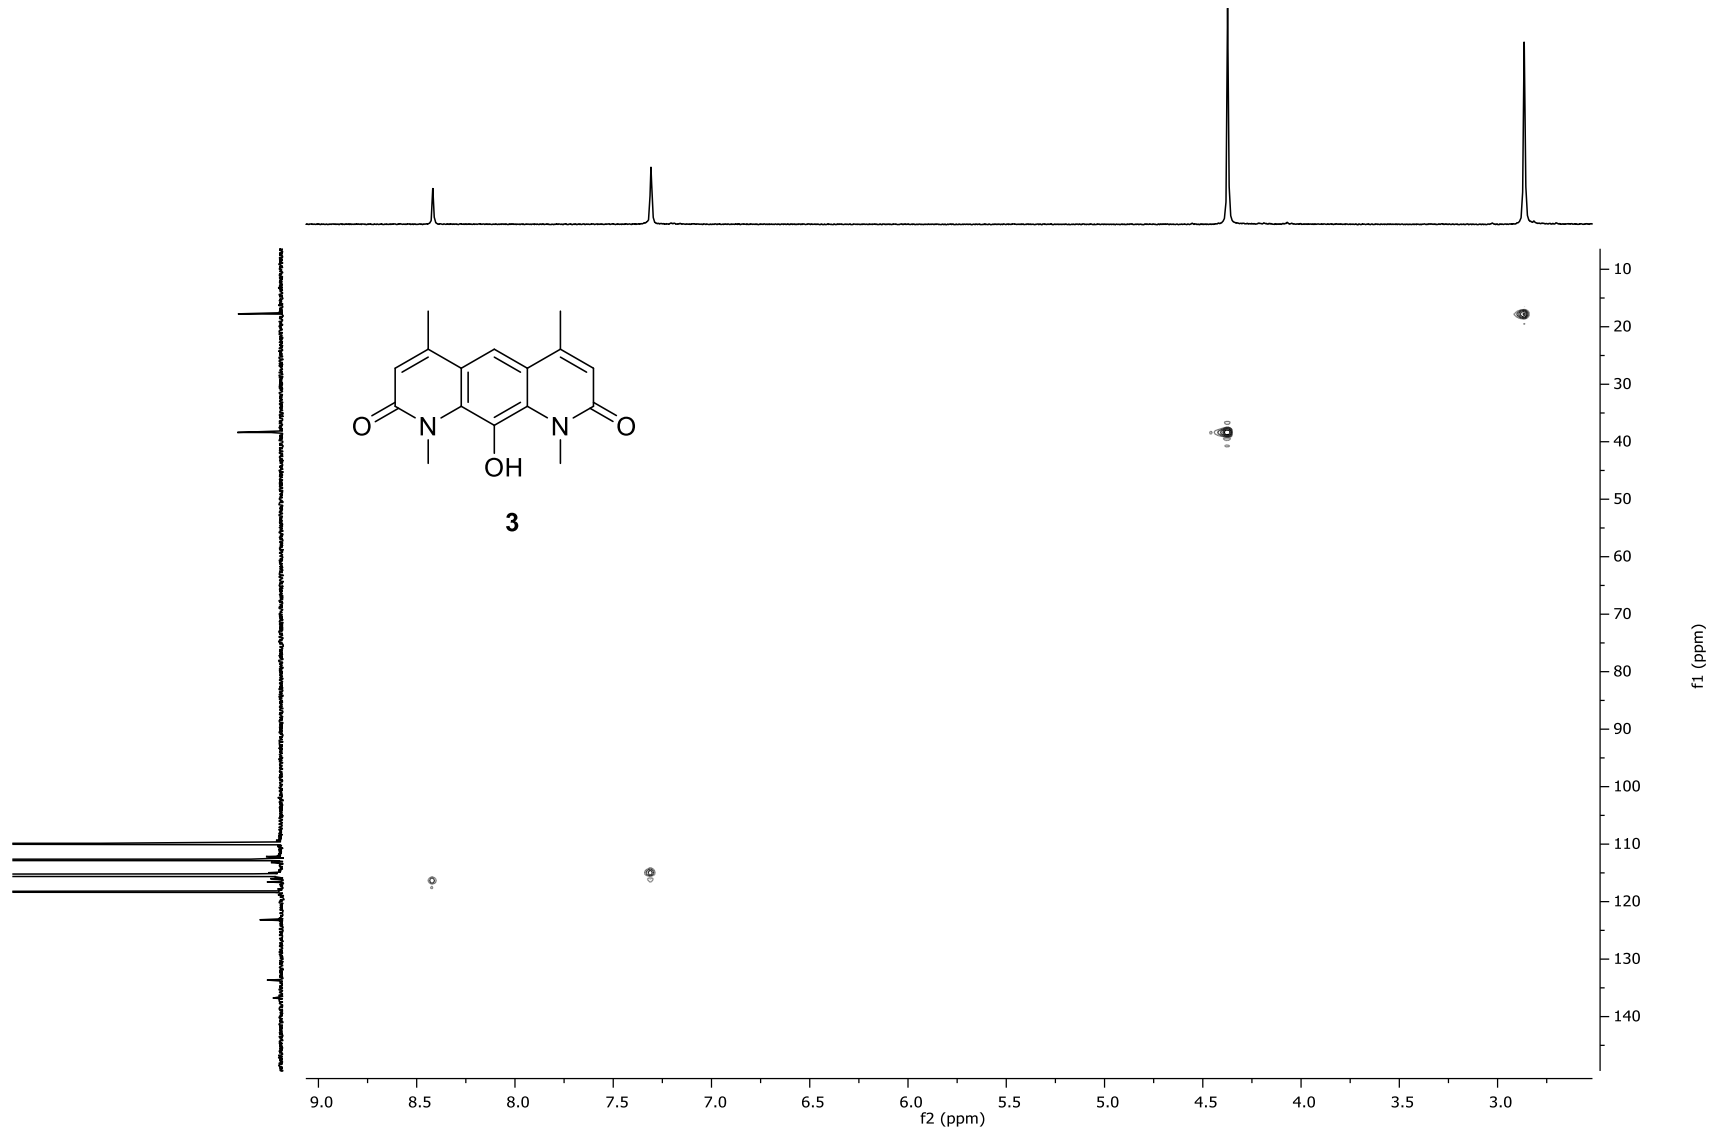

**Figure S17.** HSQC spectrum (CF<sub>3</sub>COOD, 400 MHz) of nybomycin D (3)

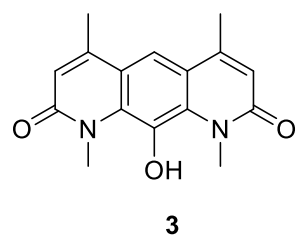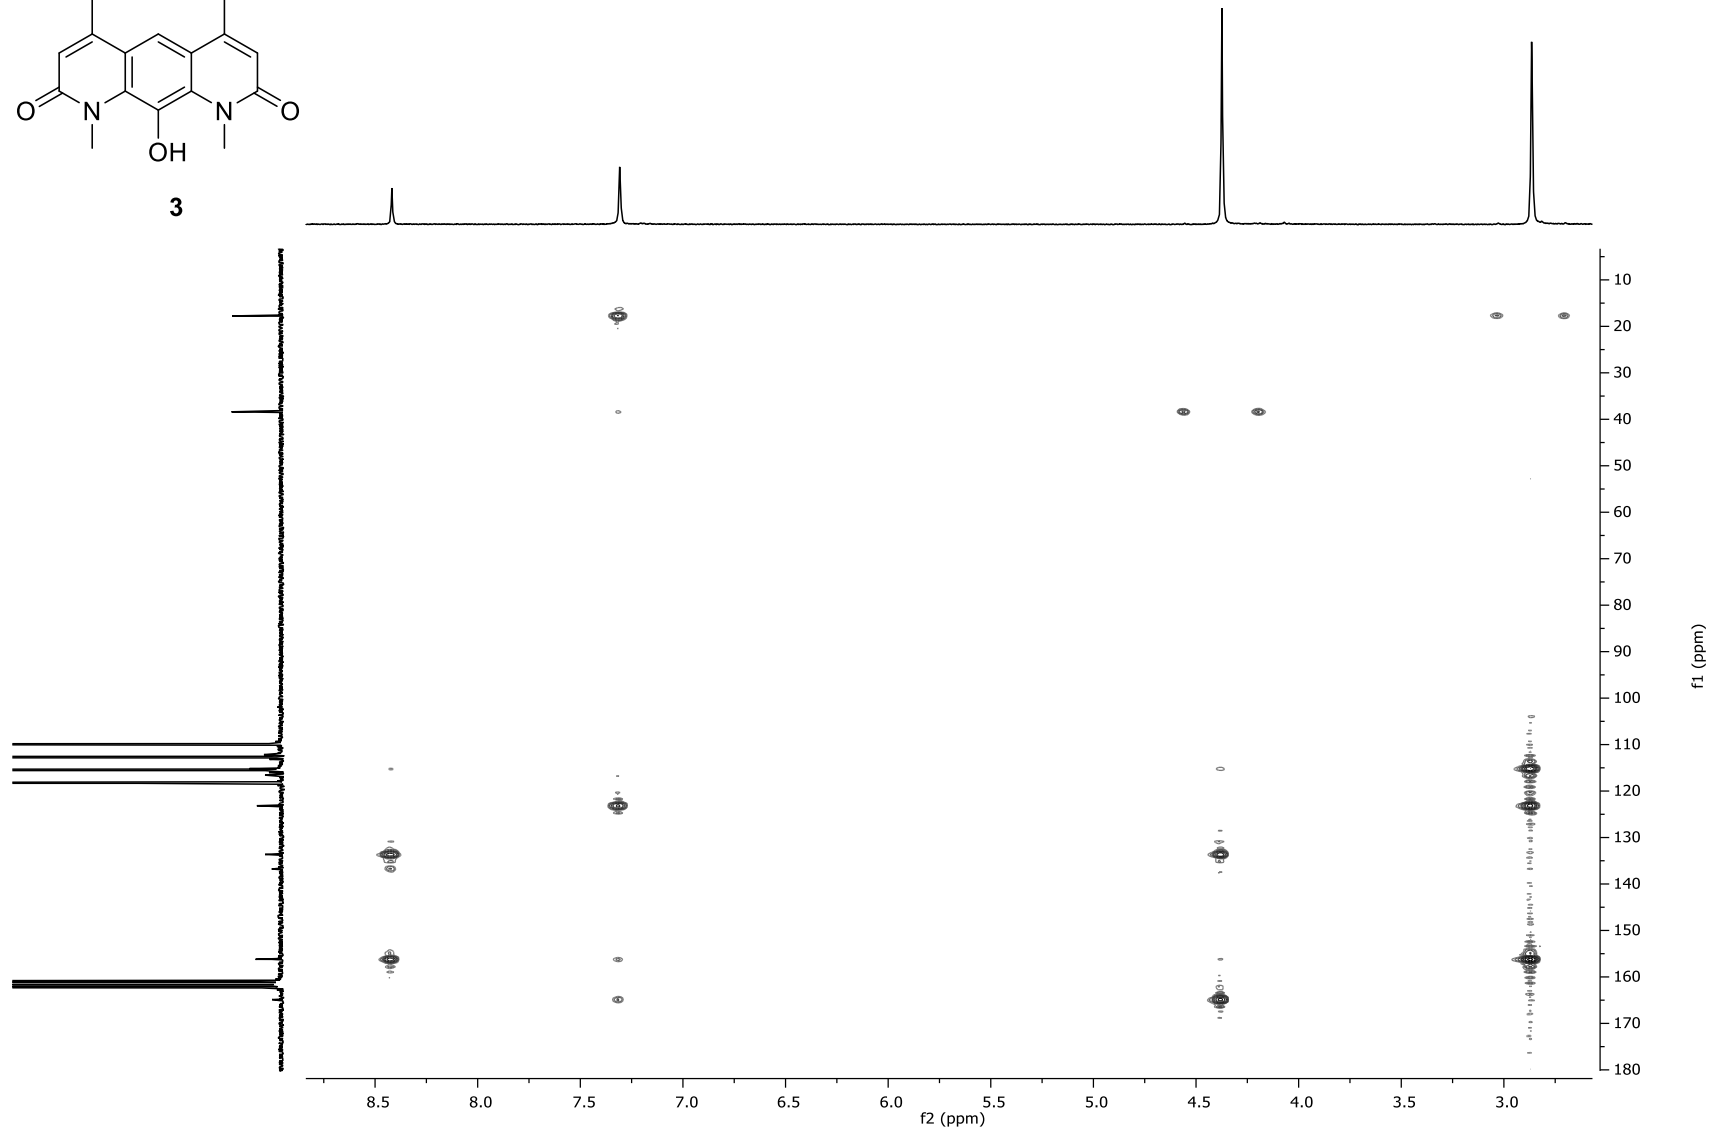

**Figure S18.** HMBC spectrum (CF<sub>3</sub>COOD, 400 MHz) of nybomycin D (**3**)

MS Spectrum

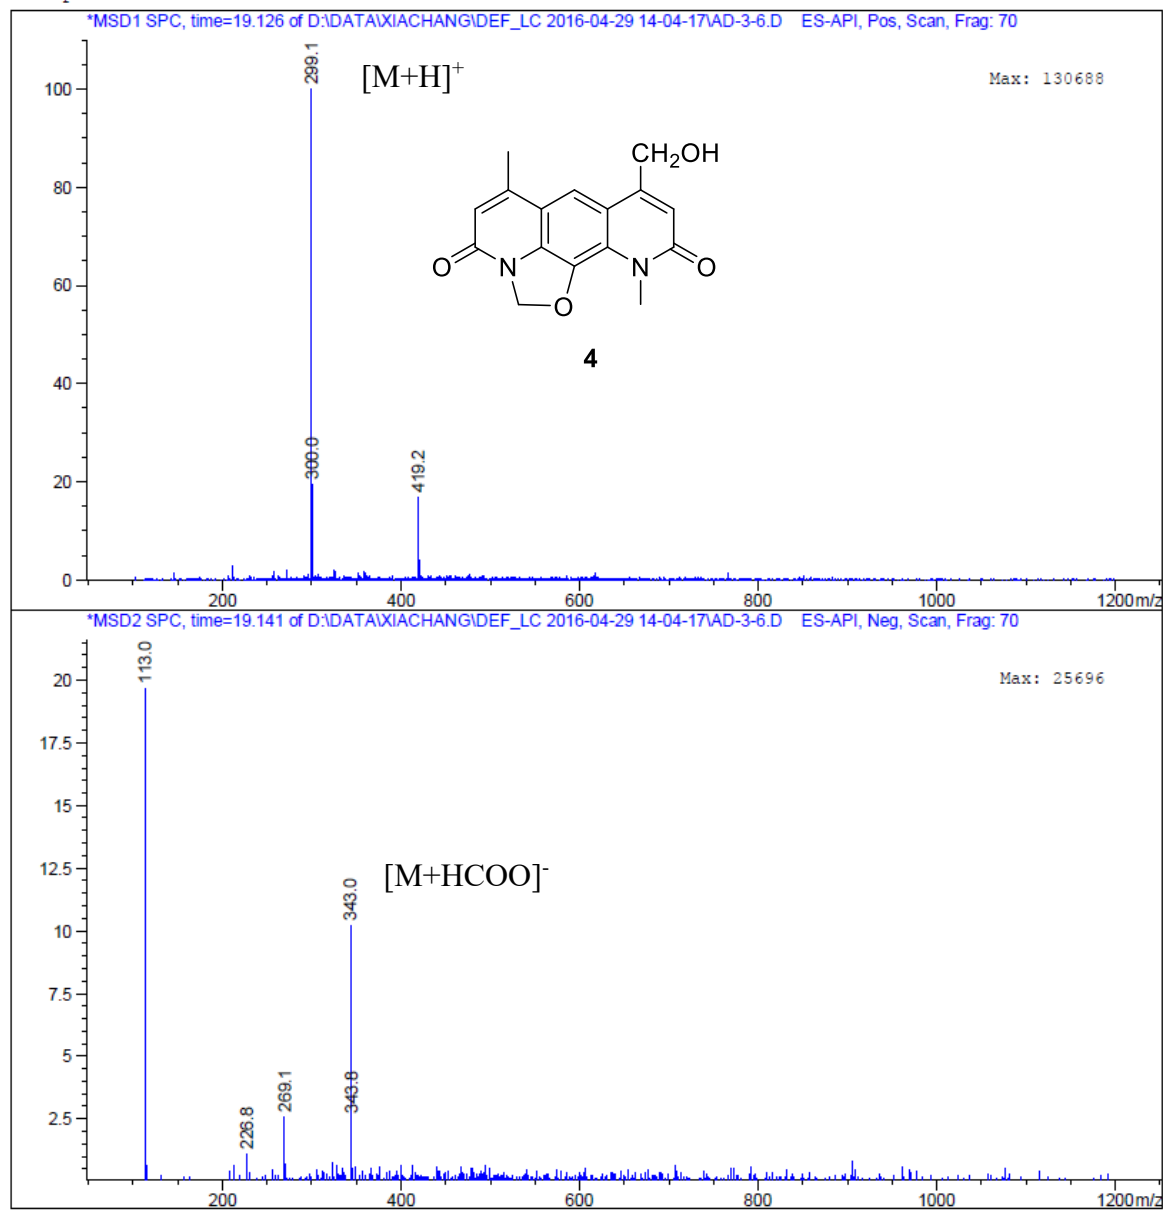

Figure S19. (±)-ESI-MS of nybomycin (**4**)

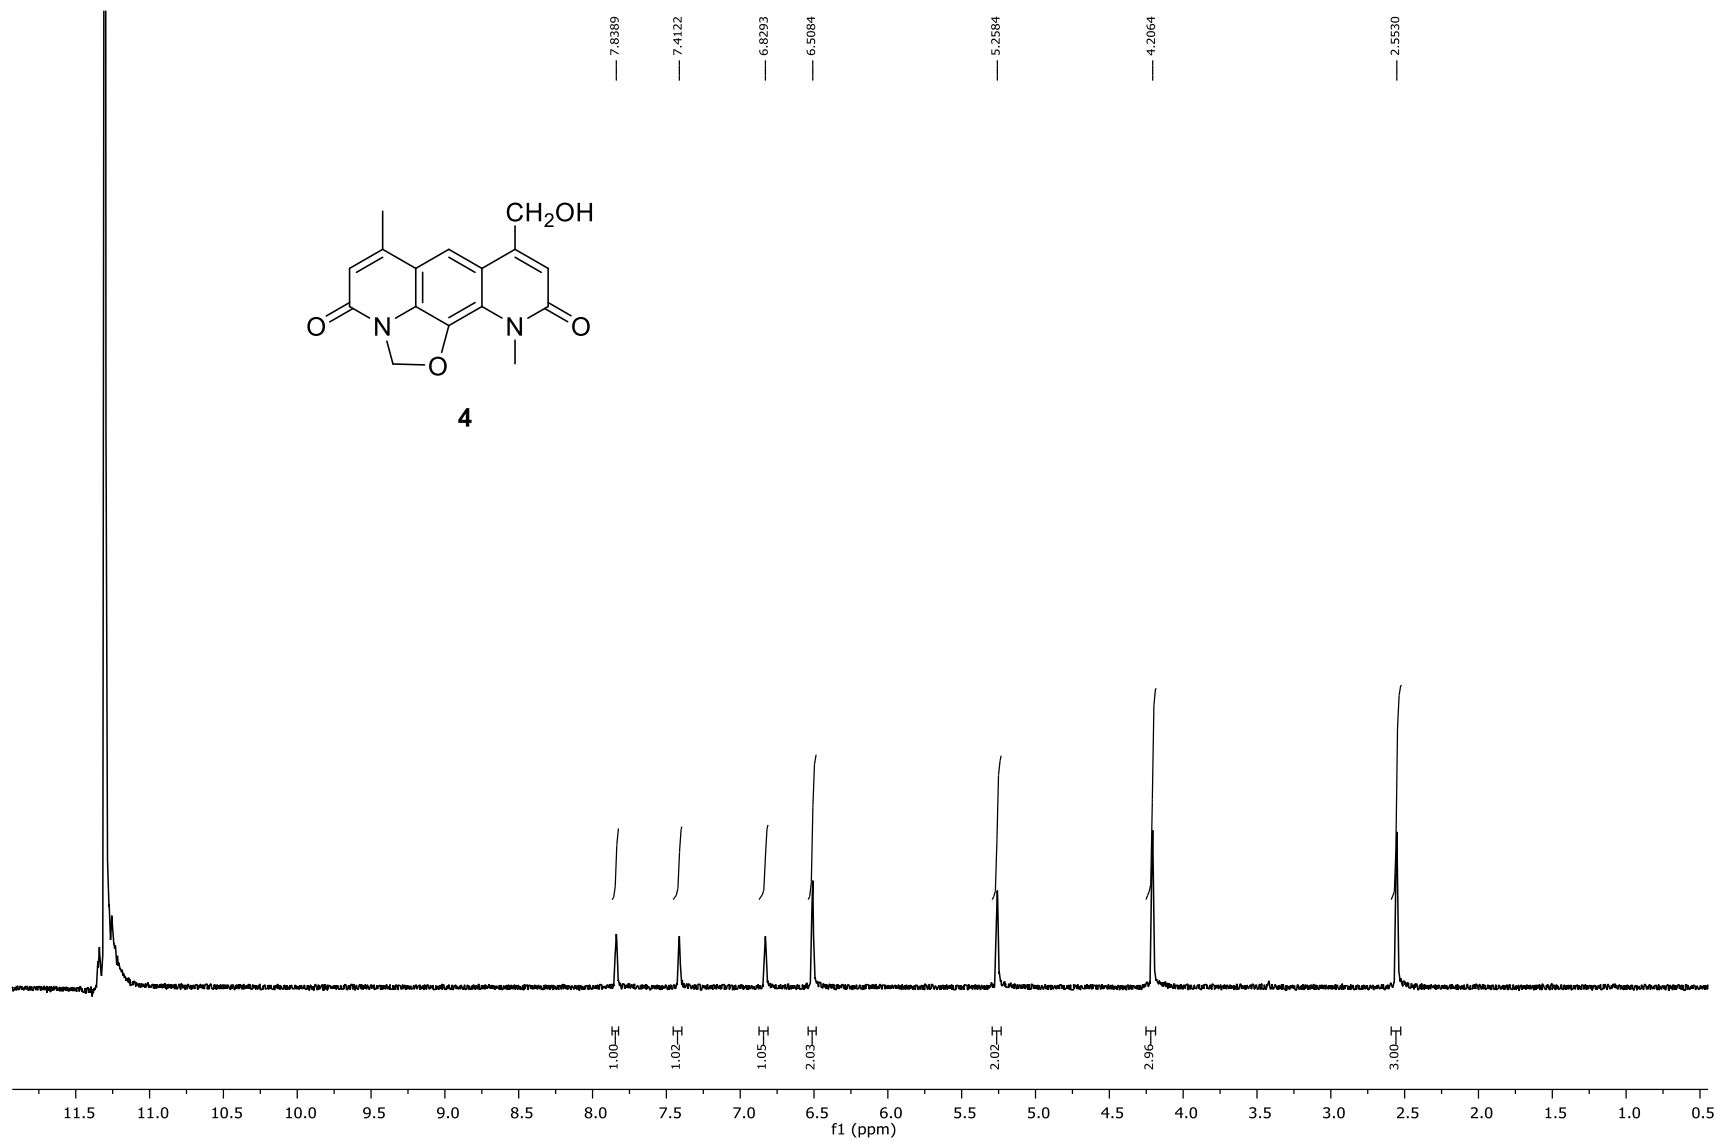

Figure S20. <sup>1</sup>H-NMR (CF<sub>3</sub>COOD, 400 MHz) of nybomycin (4)

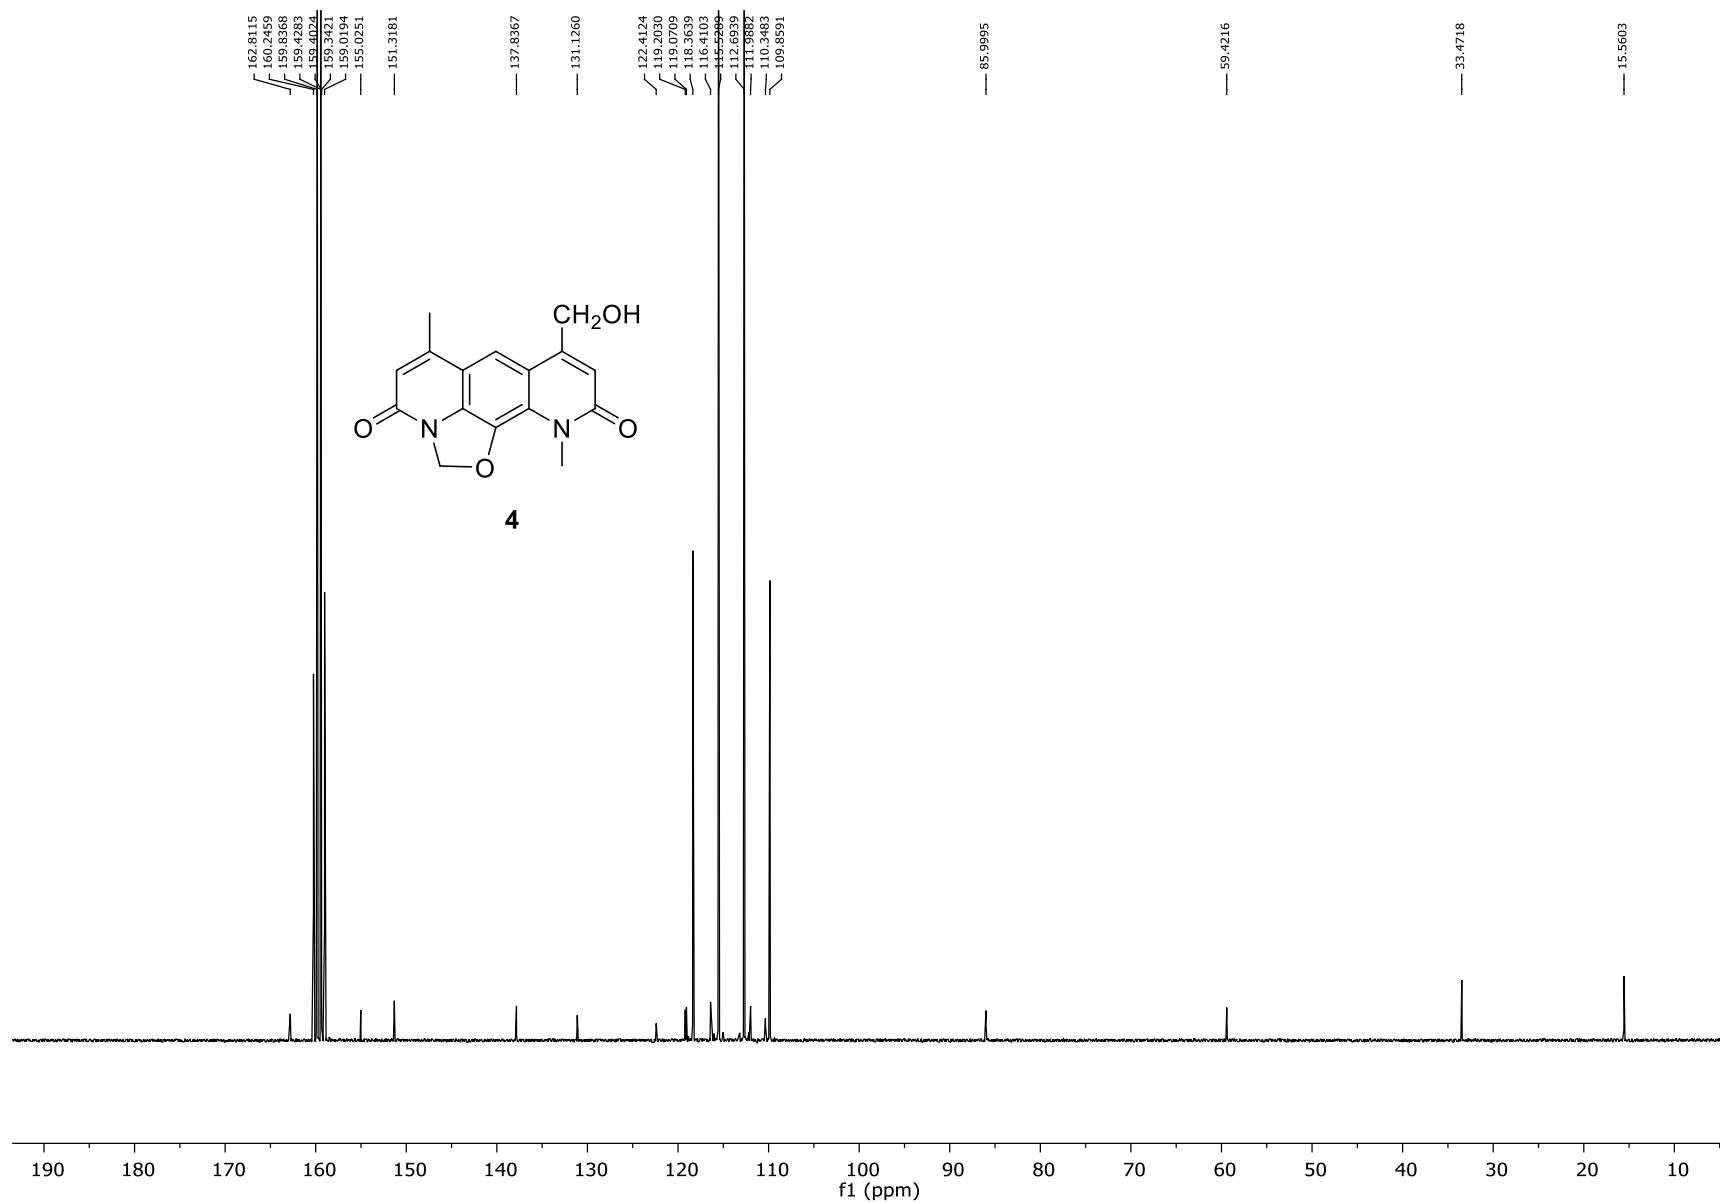

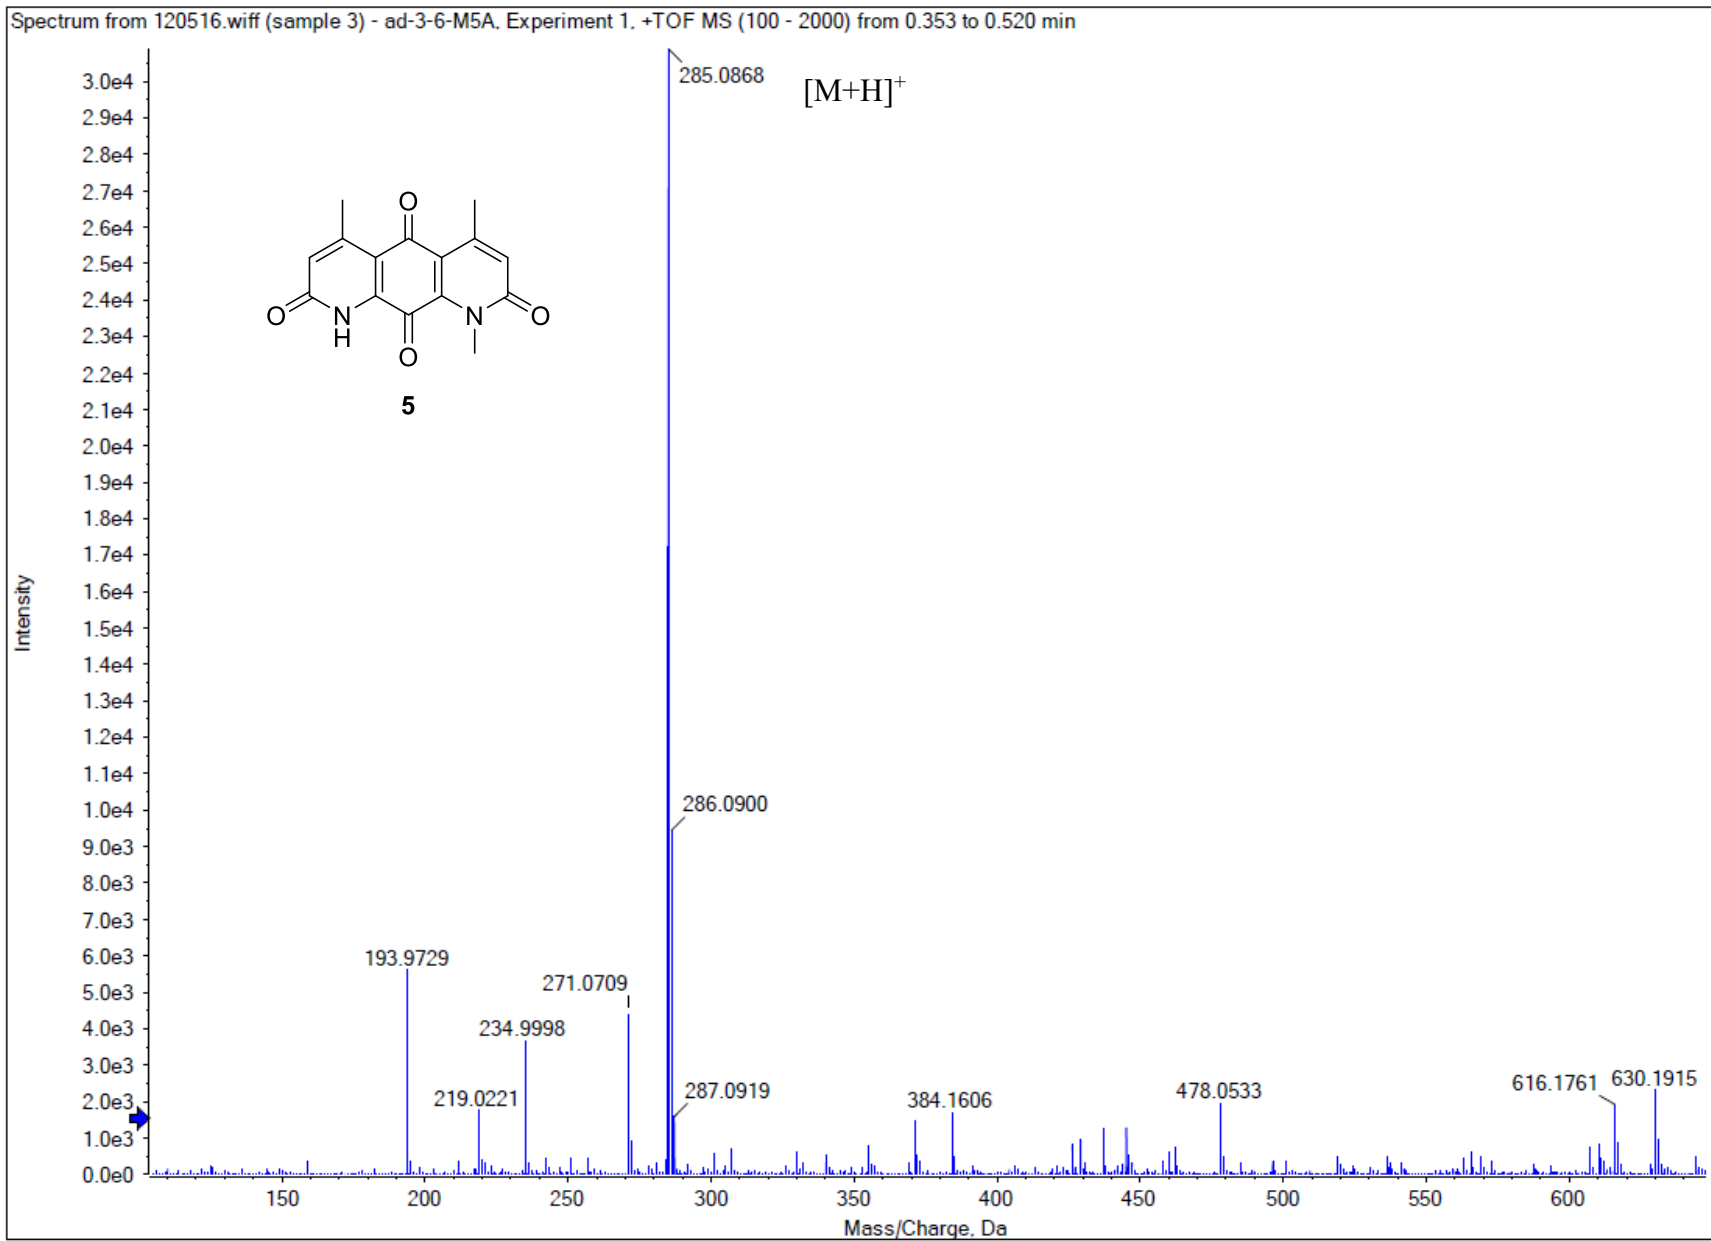

Figure S22. (+)-HRESIMS of deoxyxyboquinone (5)

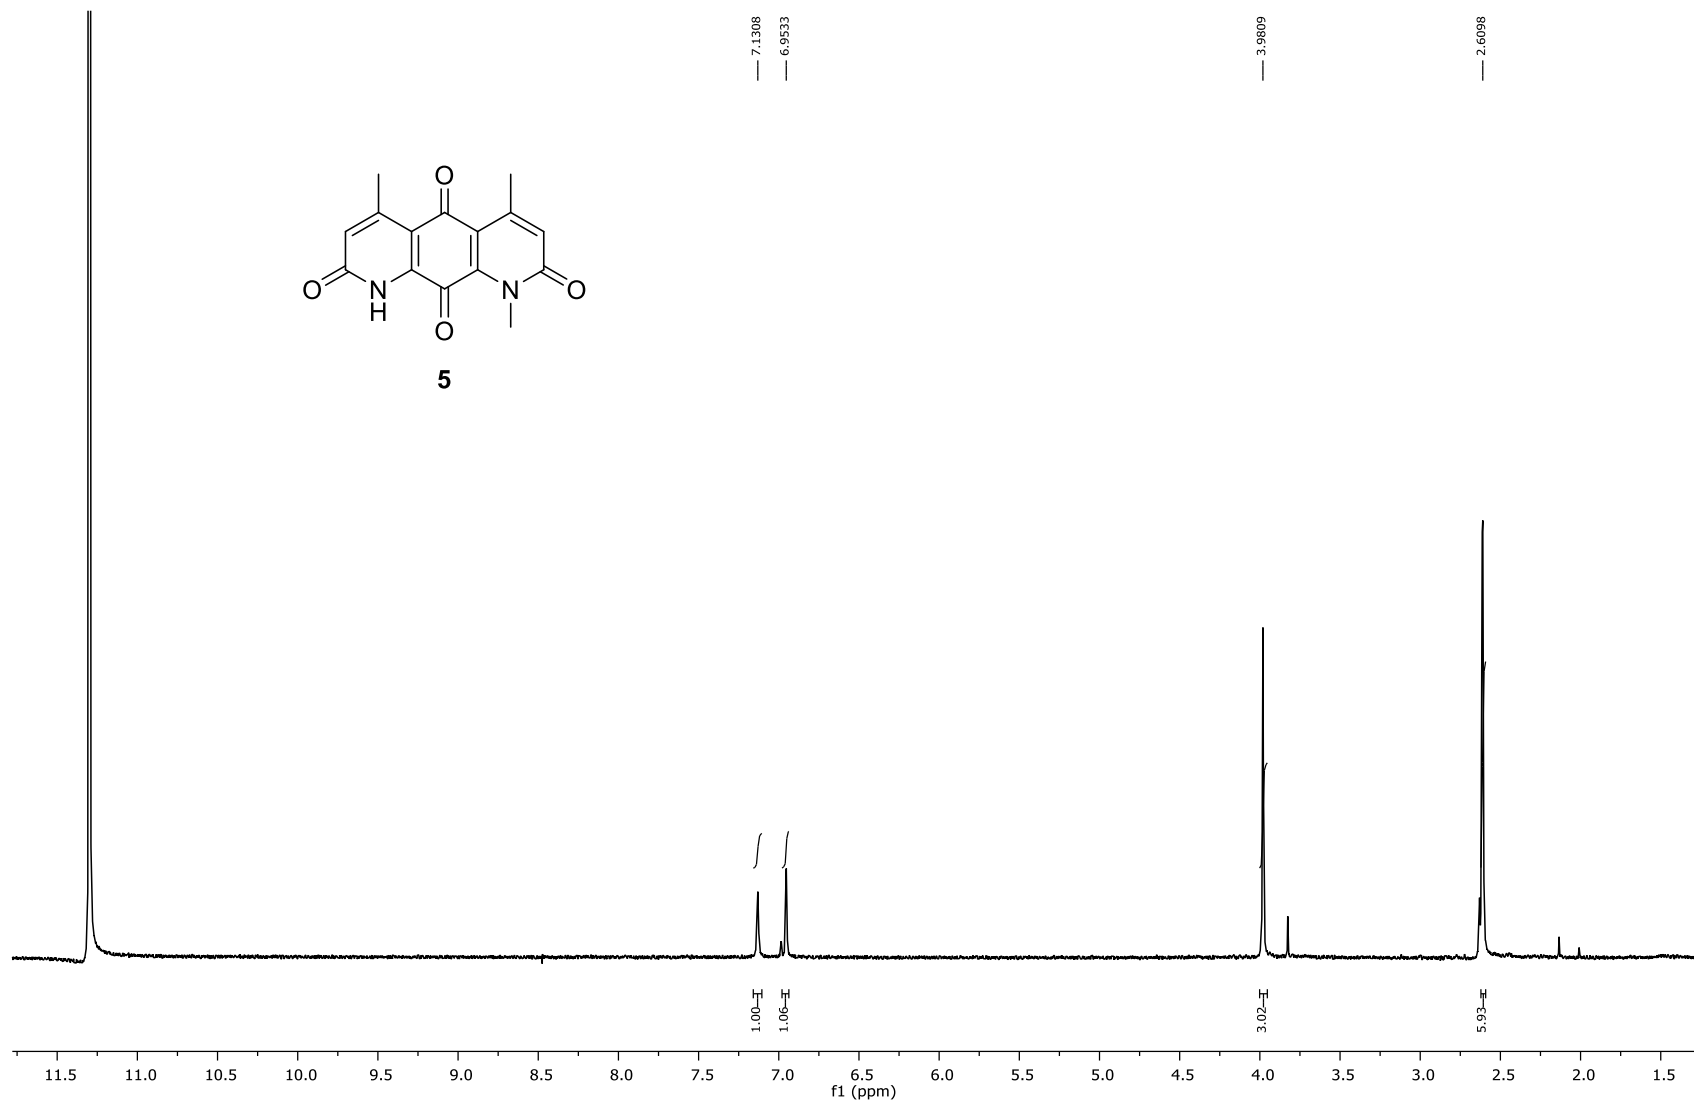

Figure S23. <sup>1</sup>H-NMR (CF<sub>3</sub>COOD, 400 MHz) of deoxyxyboquinone (**5**)



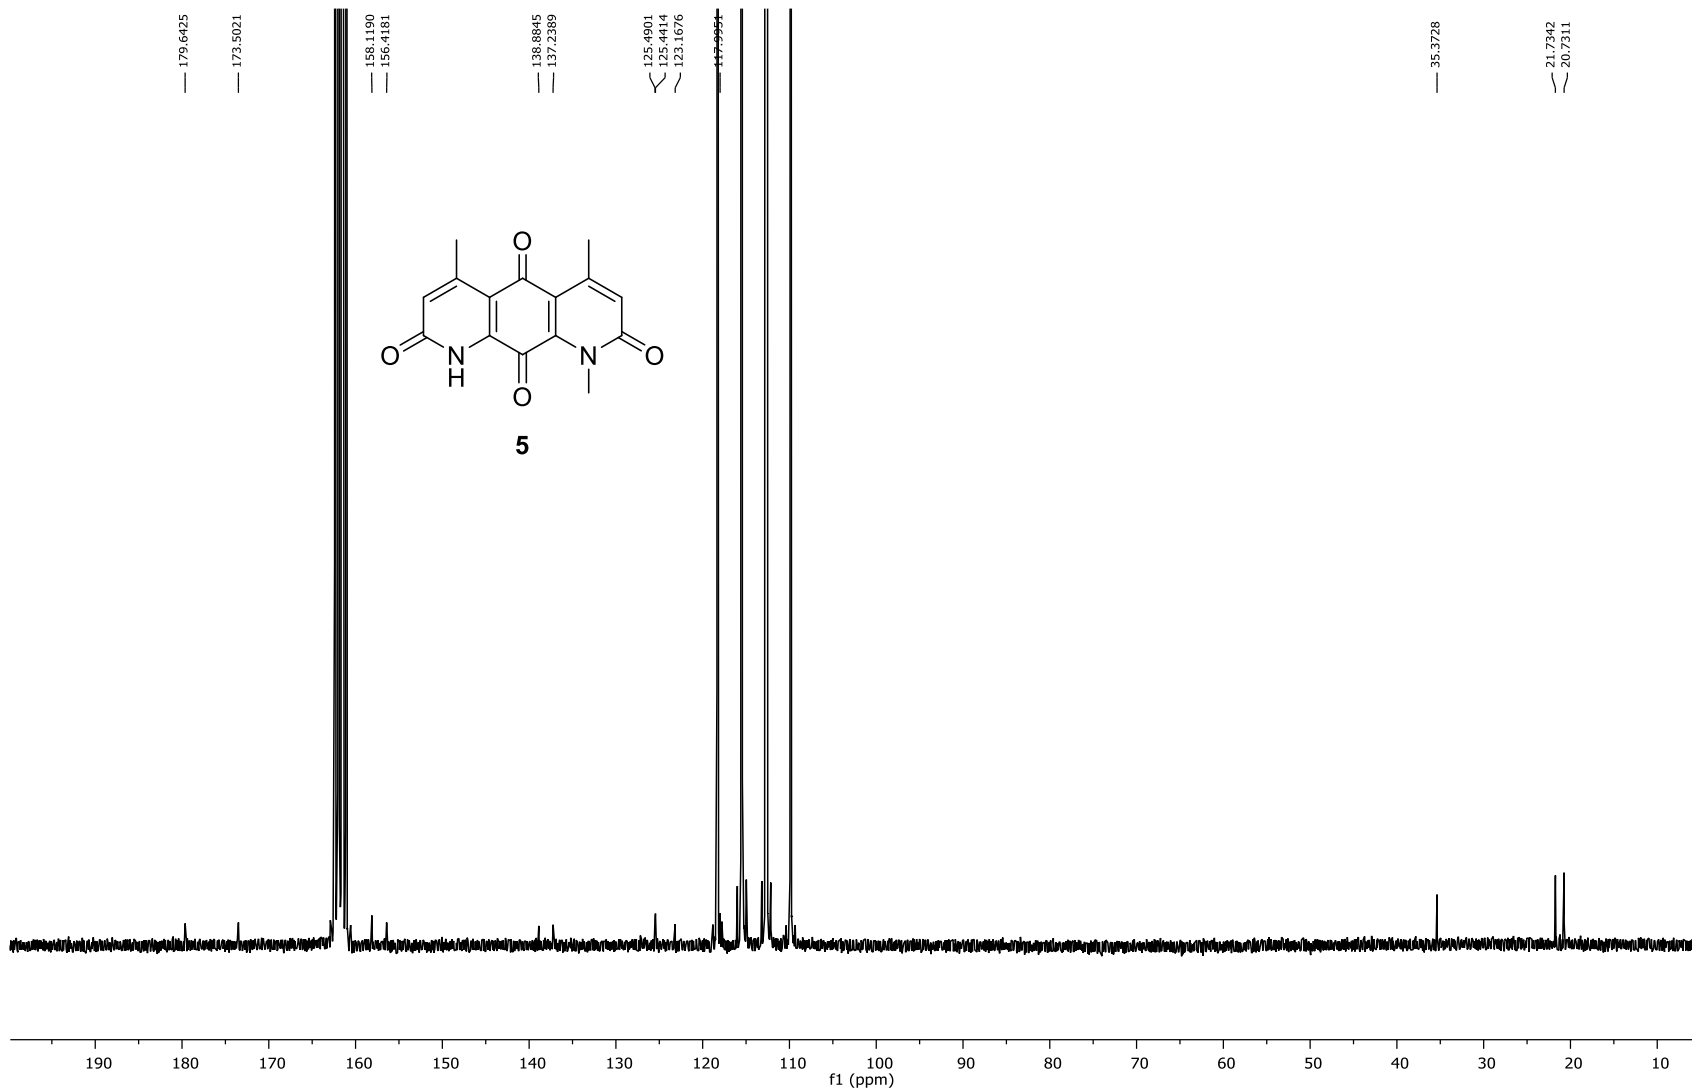

Figure S24. <sup>13</sup>C-NMR (CF<sub>3</sub>COOD, 100 MHz) of deoxyxyboquinone (5)

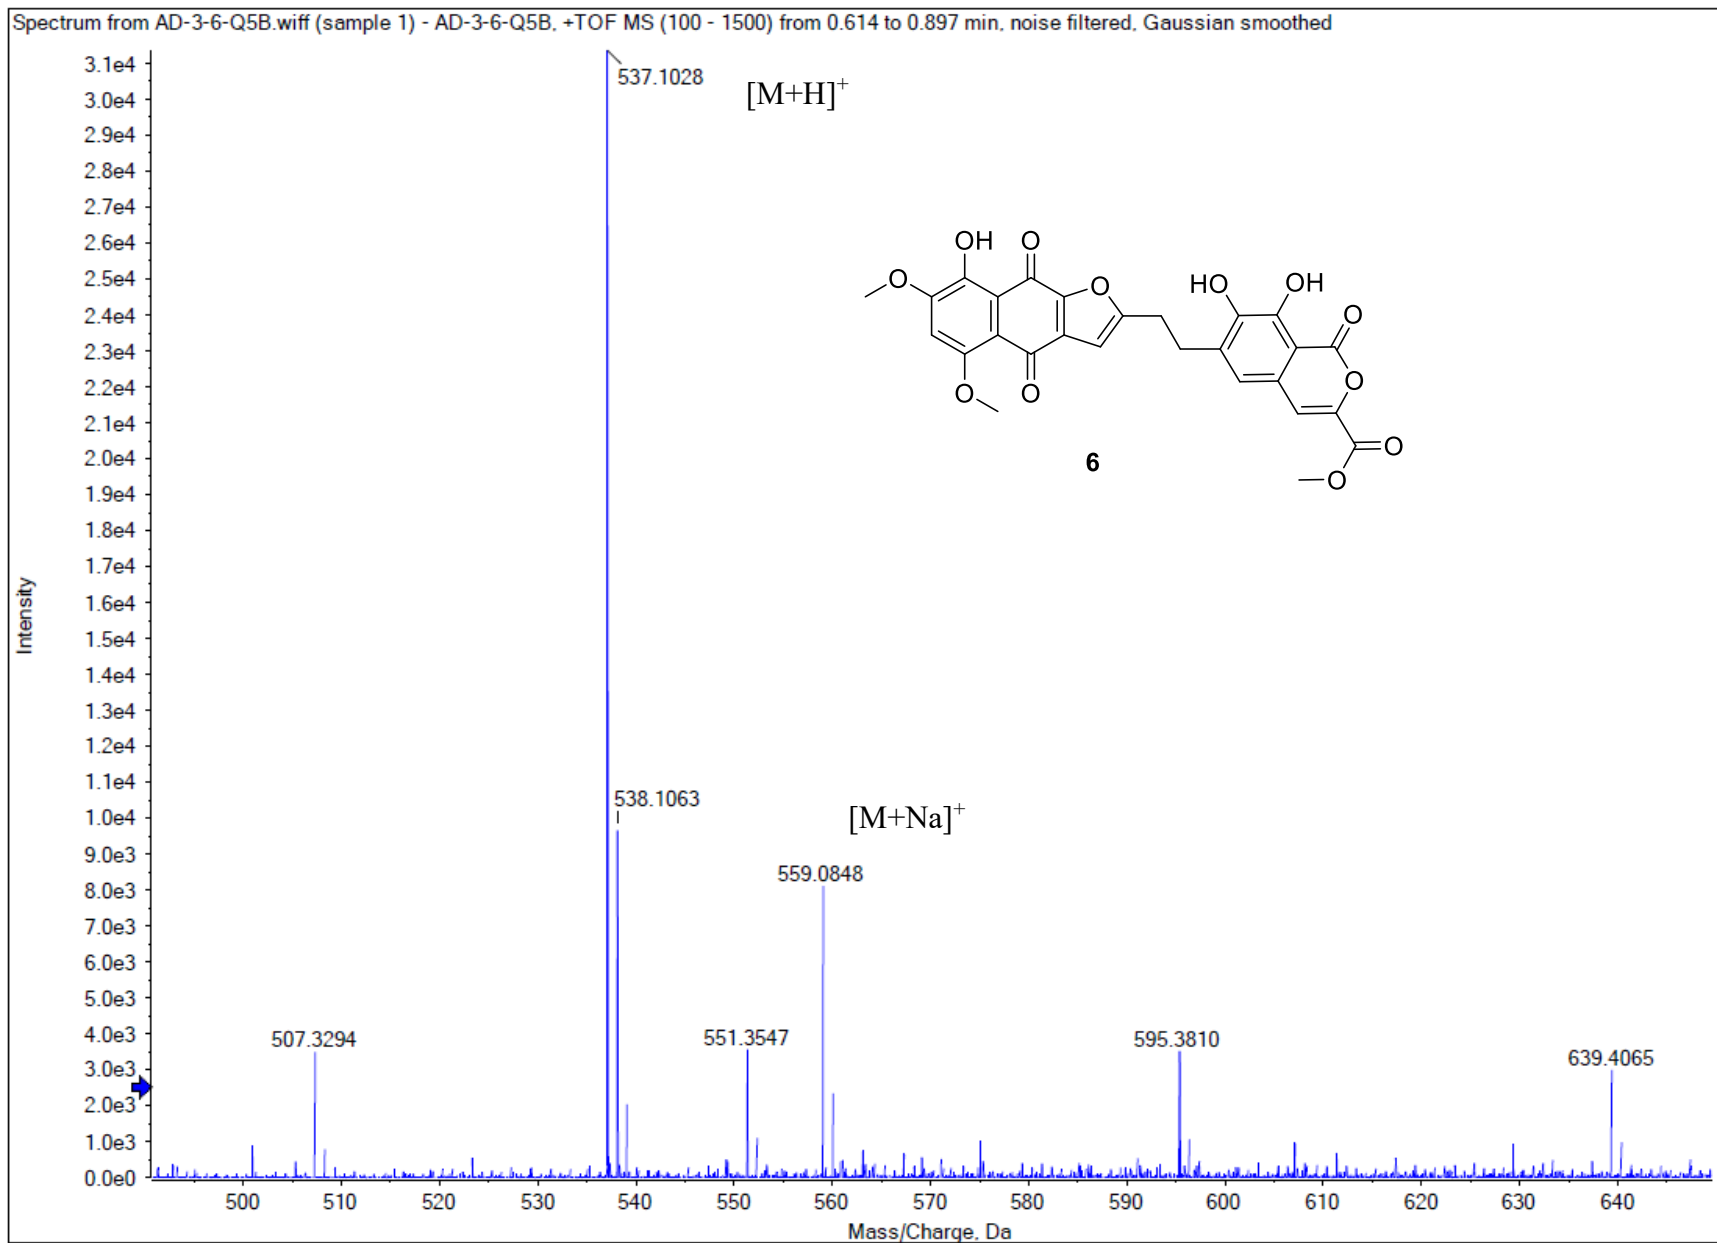

Figure S25. (+)-HRESIMS of  $\alpha$ -rubromycin (**6**)

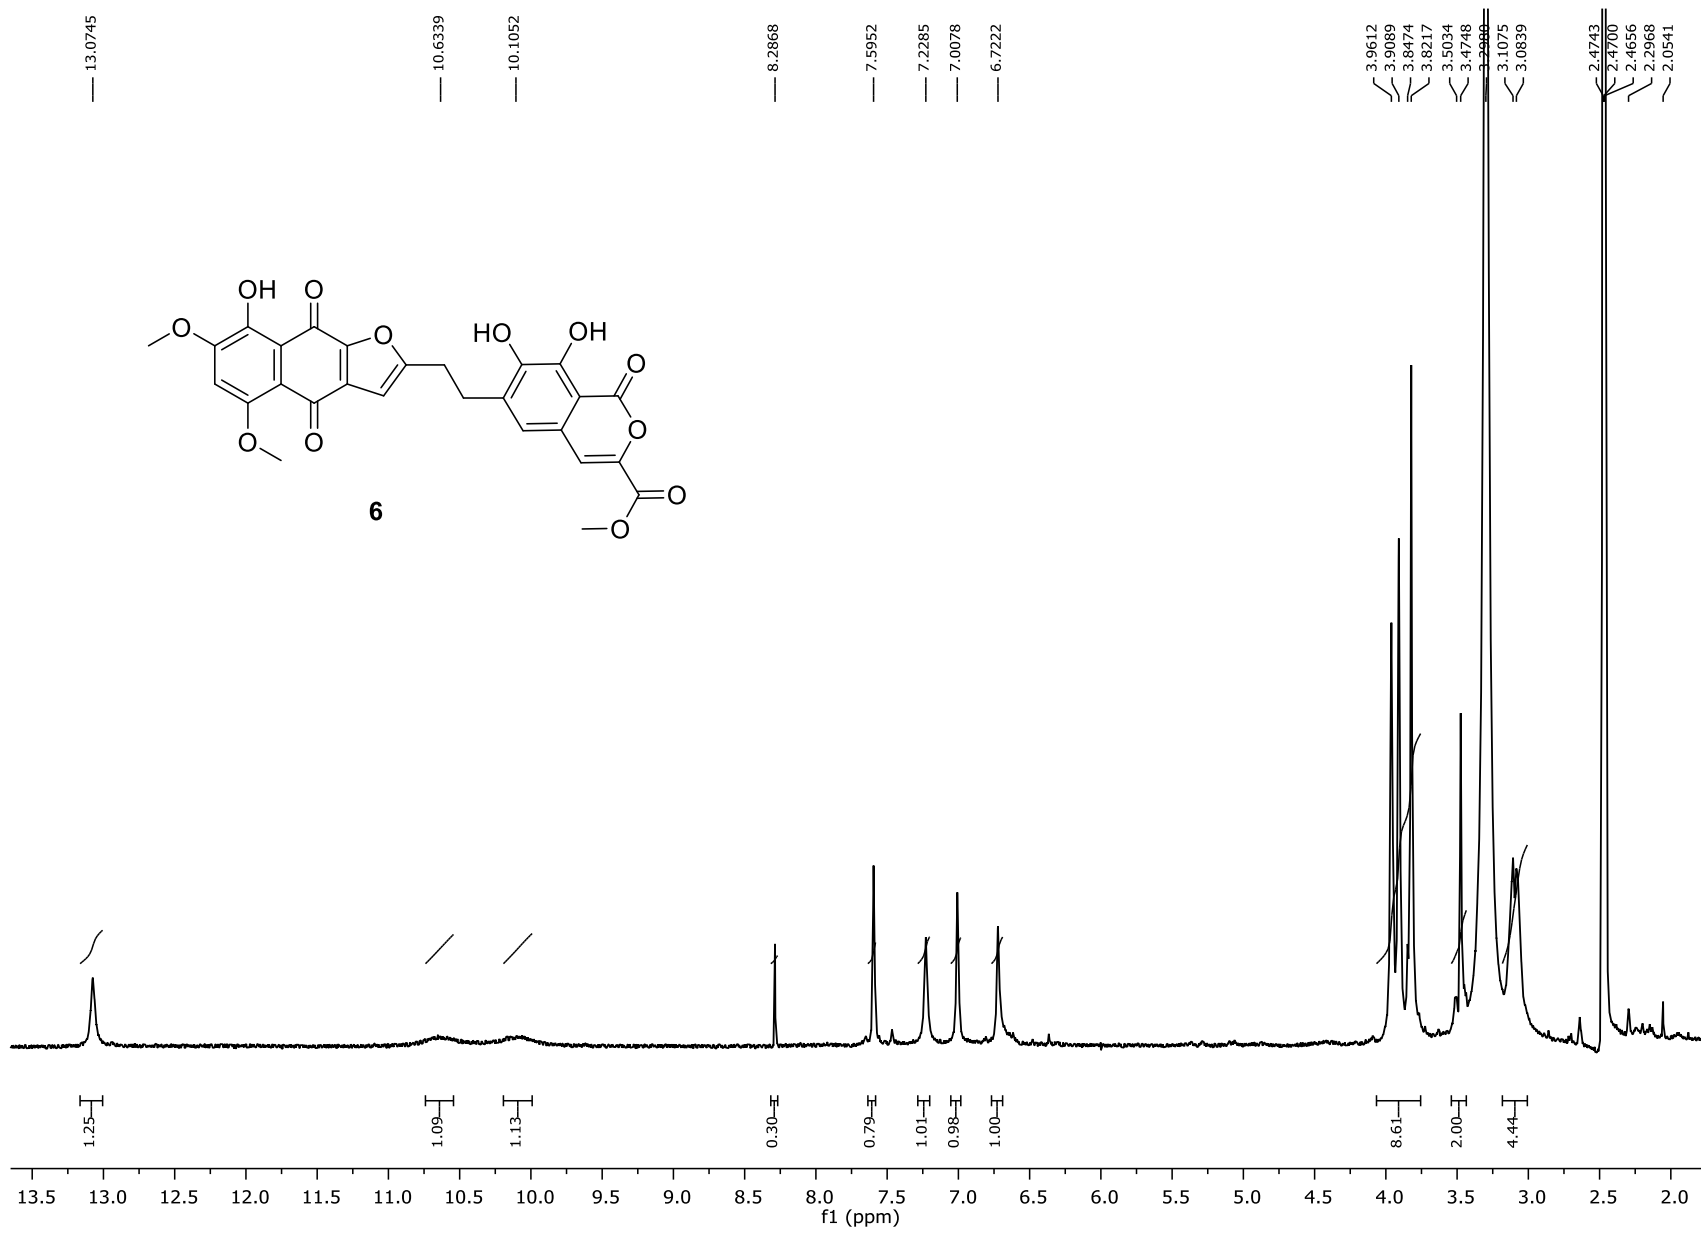

Figure S26.  $^1\text{H-NMR}$  (DMSO- $d_6$ , 400 MHz) of  $\alpha$ -rubromycin (6)

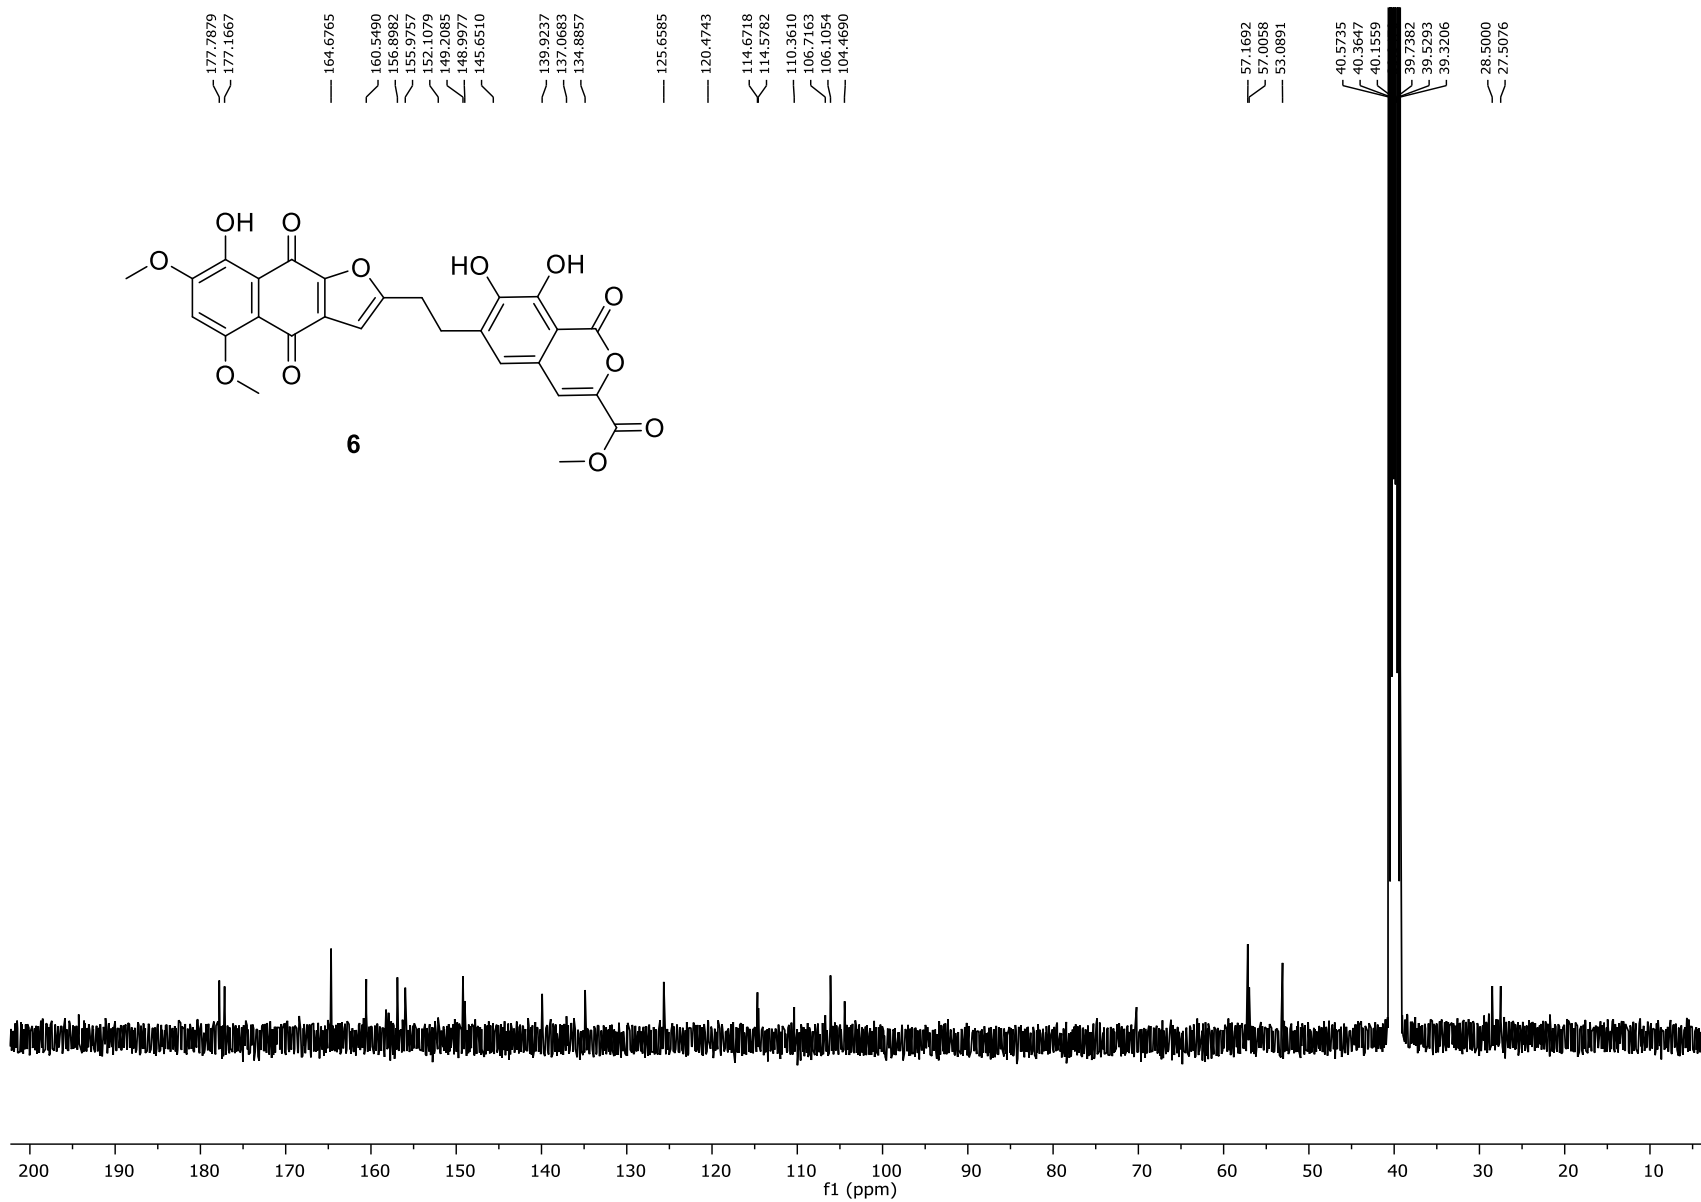

Figure S27.  $^{13}\text{C-NMR}$  (DMSO- $d_6$ , 100 MHz) of  $\alpha$ -rubromycin (6)

MS Spectrum

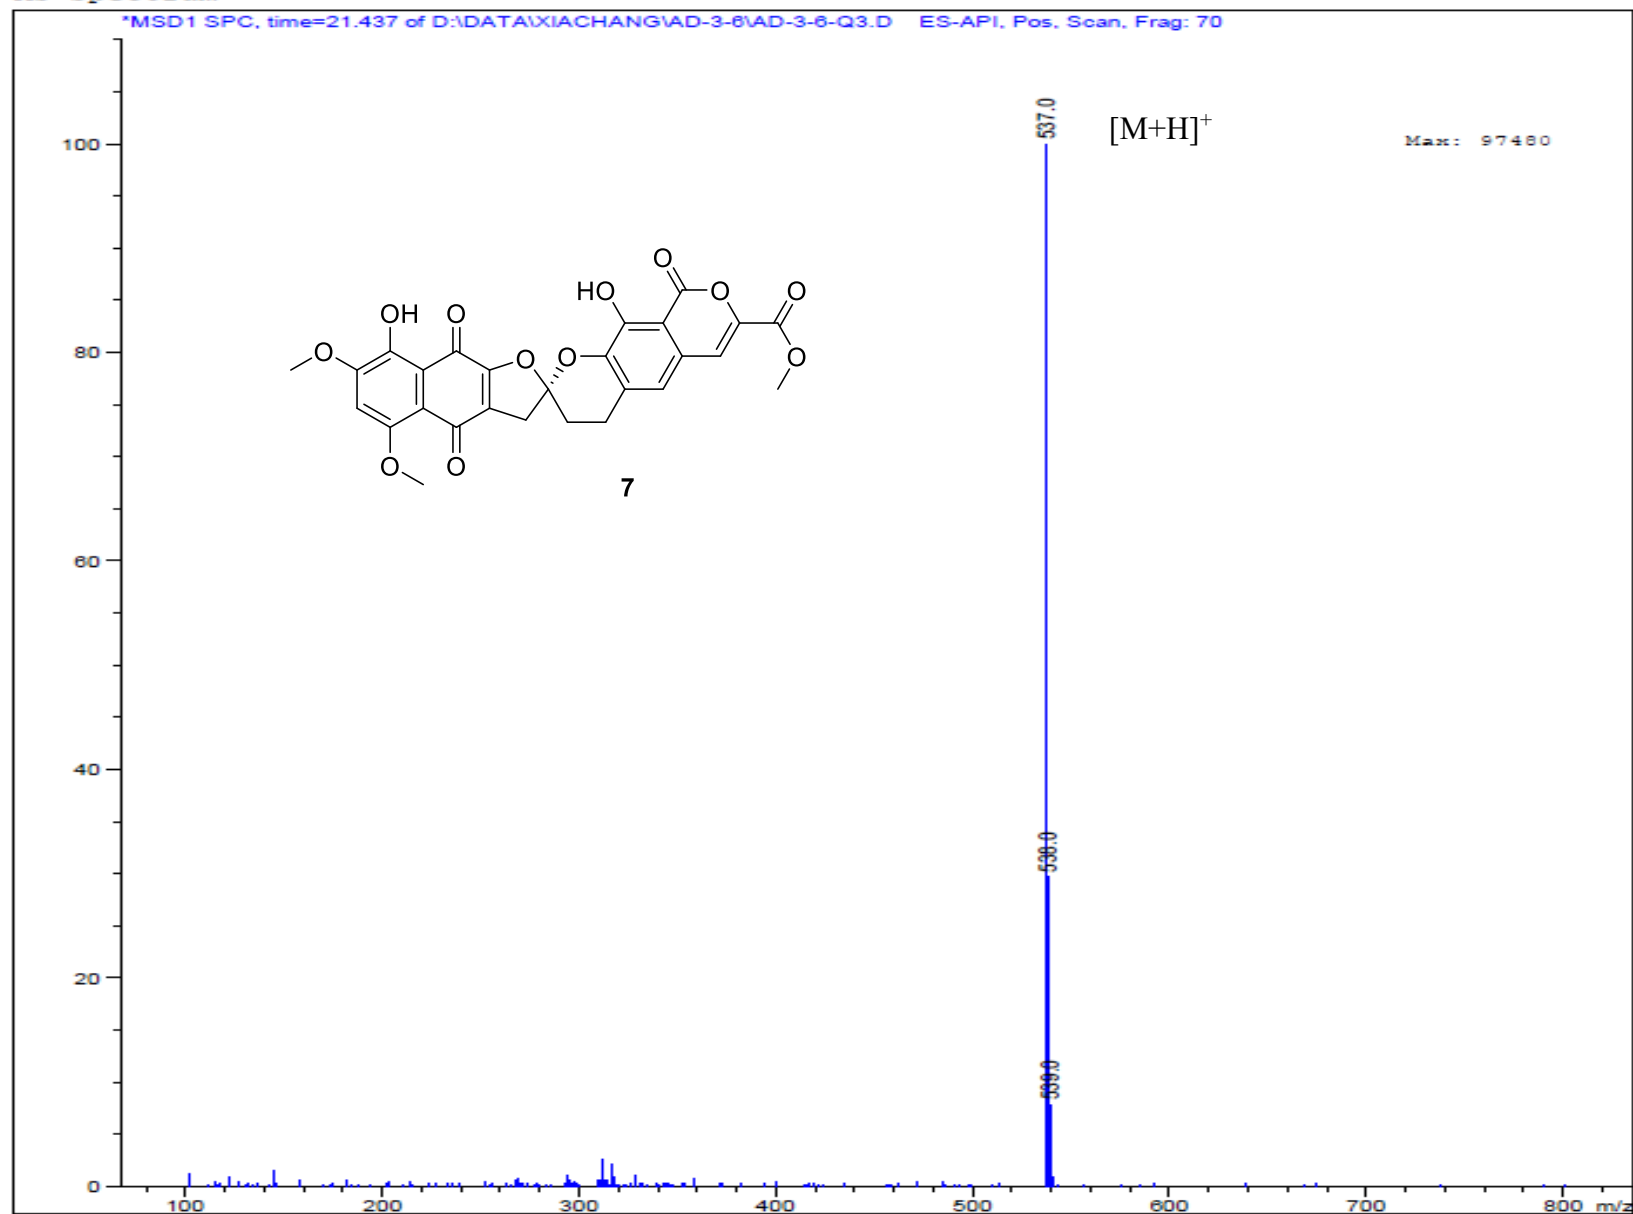

Figure S28. (+)-ESI-MS of  $\beta$ -rubromycin (7)

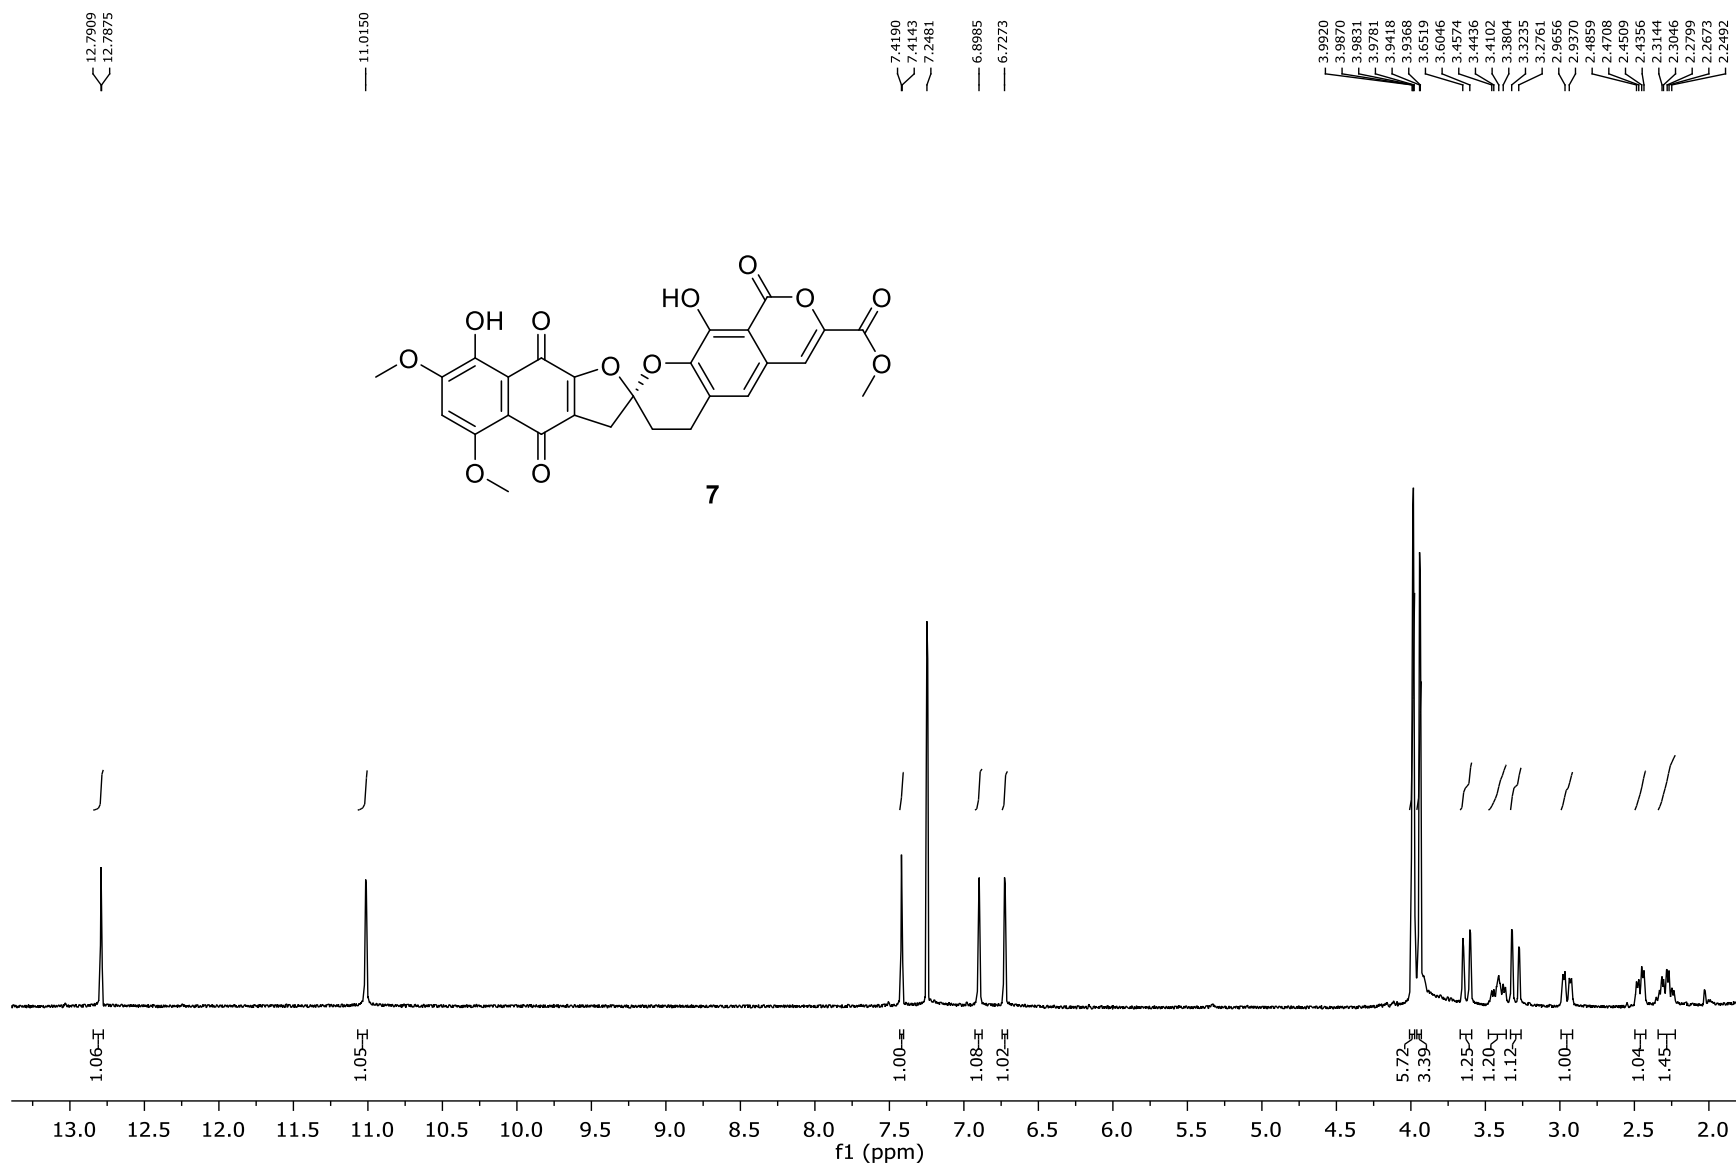

Figure S29.  $^1\text{H-NMR}$  (CDCl<sub>3</sub>, 400 MHz) of  $\beta$ -rubromycin (7)

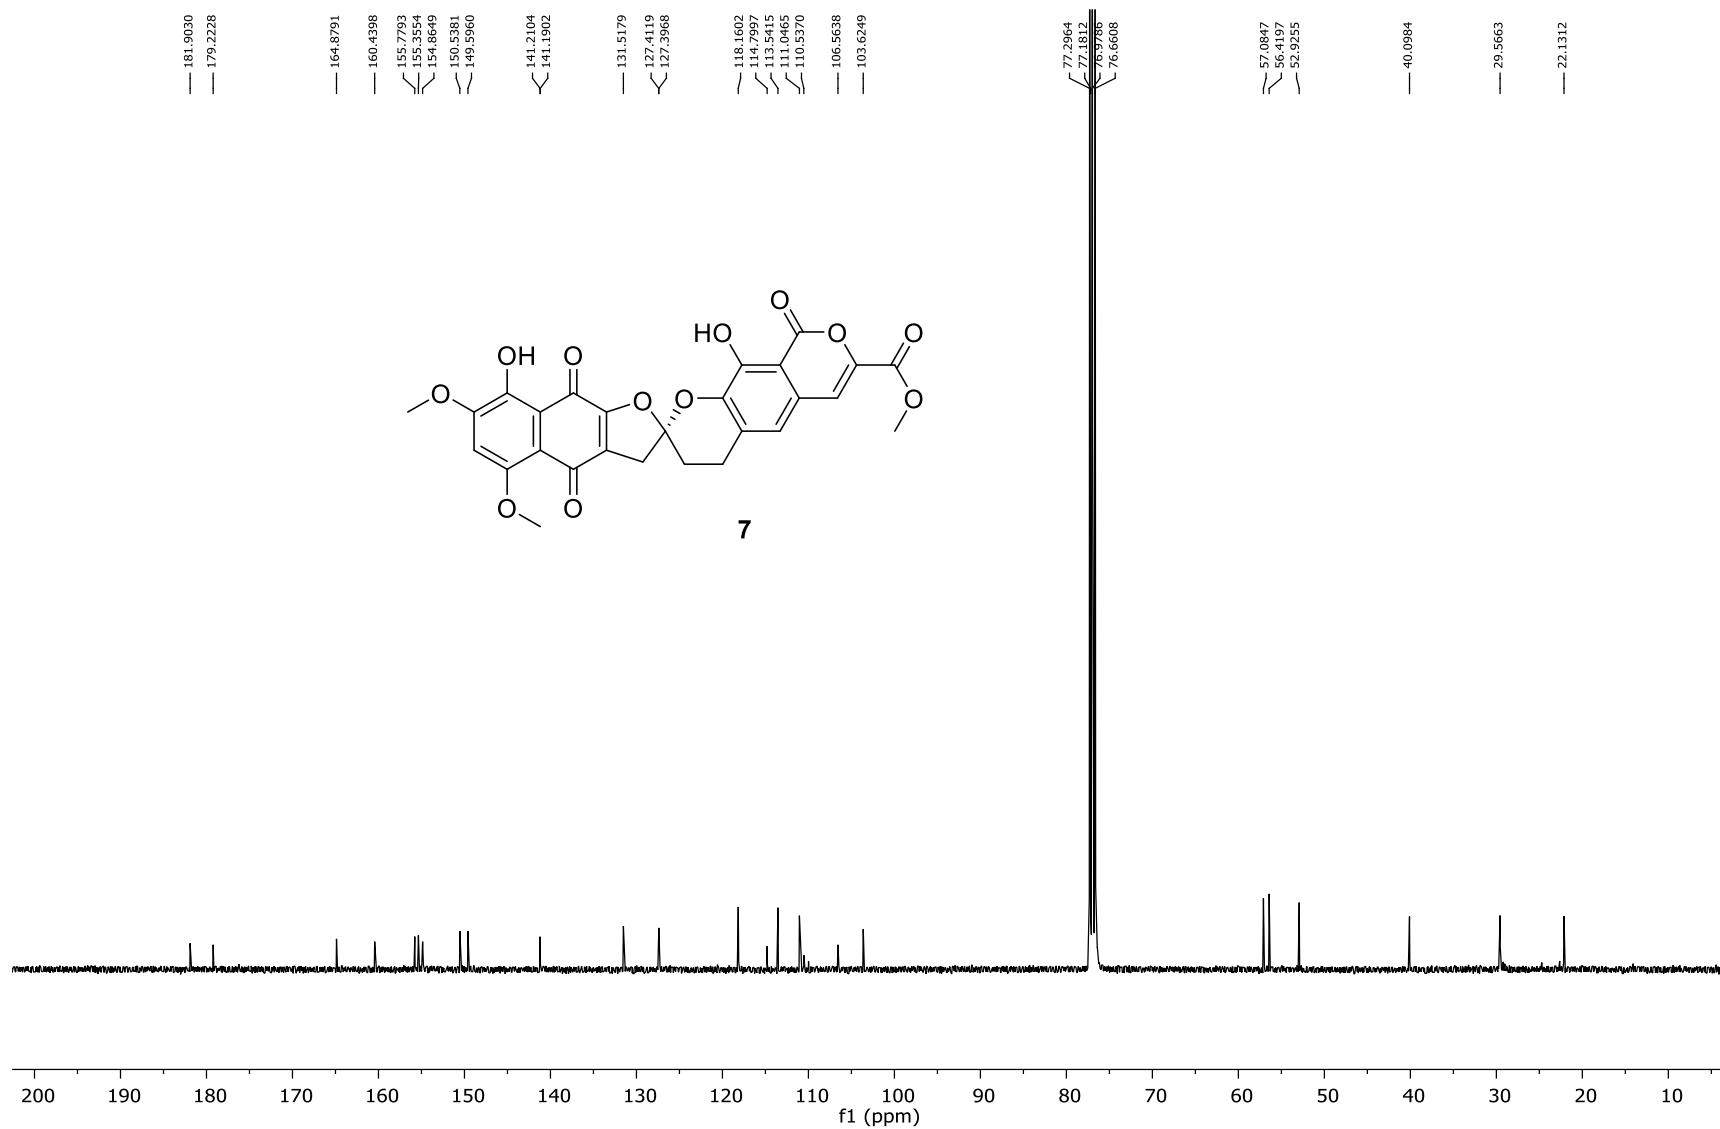

Figure S30.  $^{13}\text{C-NMR}$  ( $\text{CDCl}_3$ , 100 MHz) of  $\beta$ -rubromycin (7)

MS Spectrum

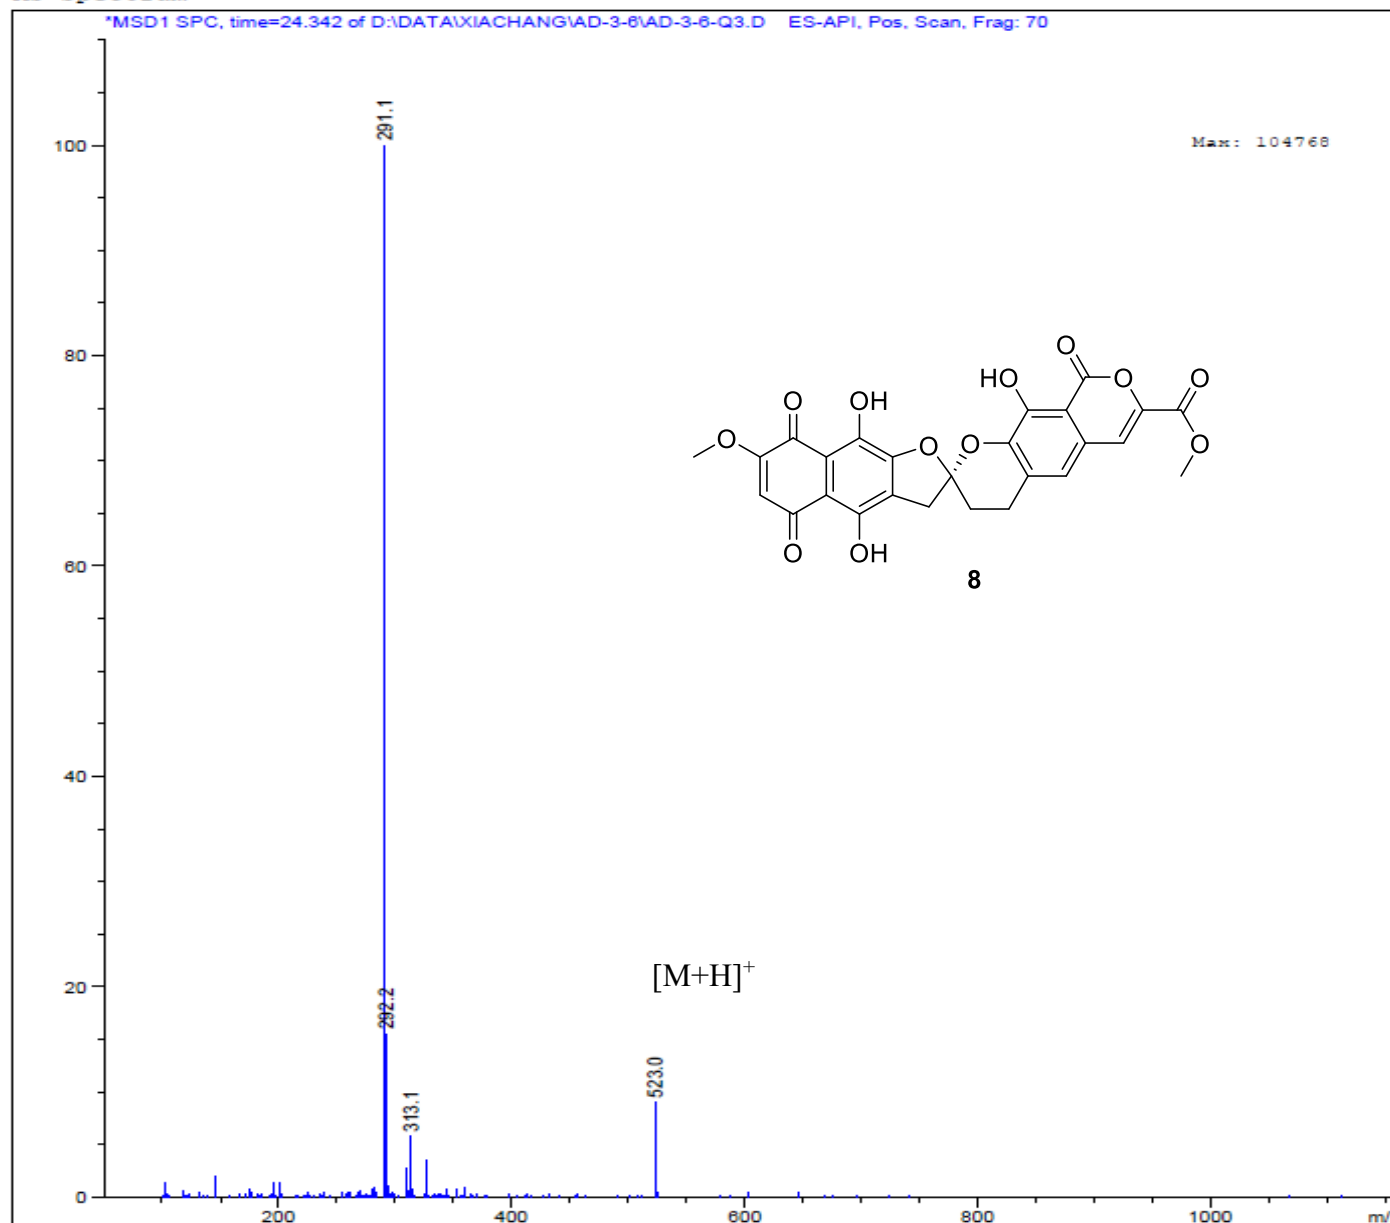

Figure S31. (+)-ESI-MS of  $\gamma$ -rubromycin (**8**)



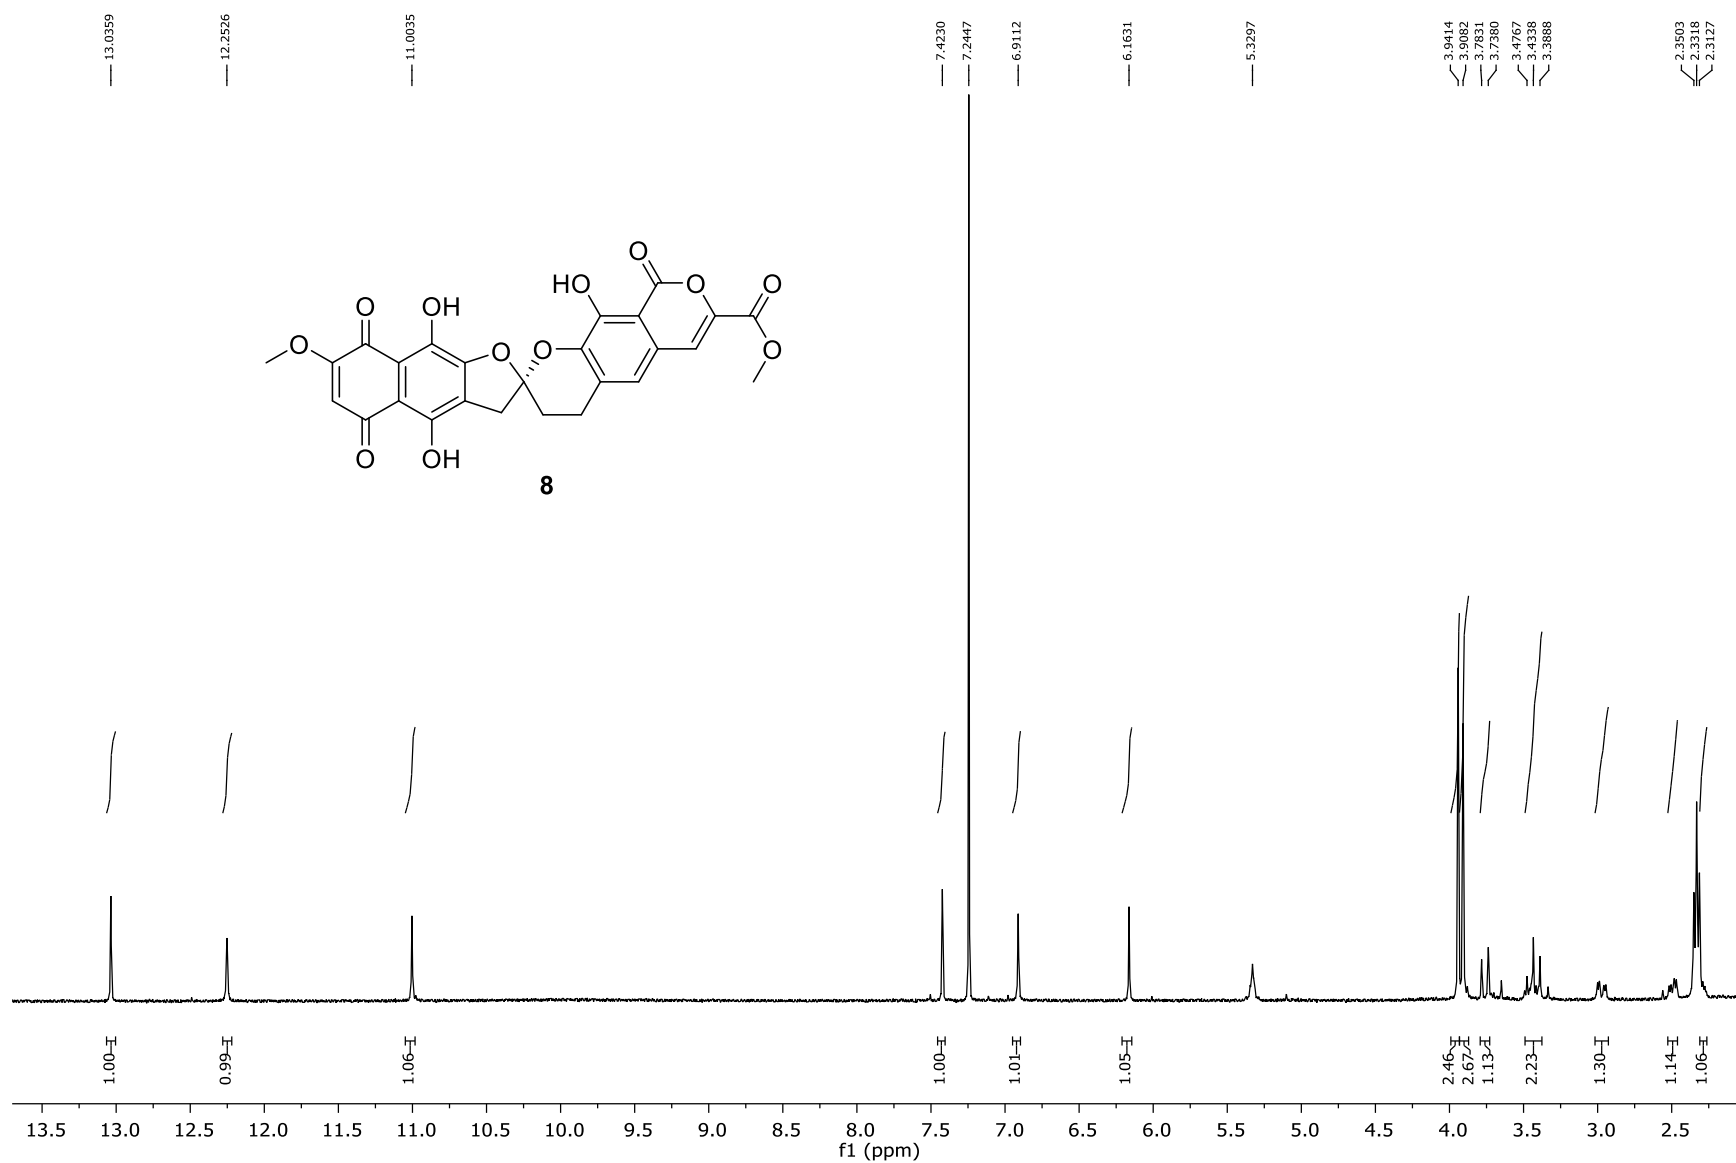

**Figure S32.**  $^1\text{H-NMR}$  (DMSO- $d_6$ , 500 MHz) of  $\gamma$ -rubromycin (**8**)

MS Spectrum

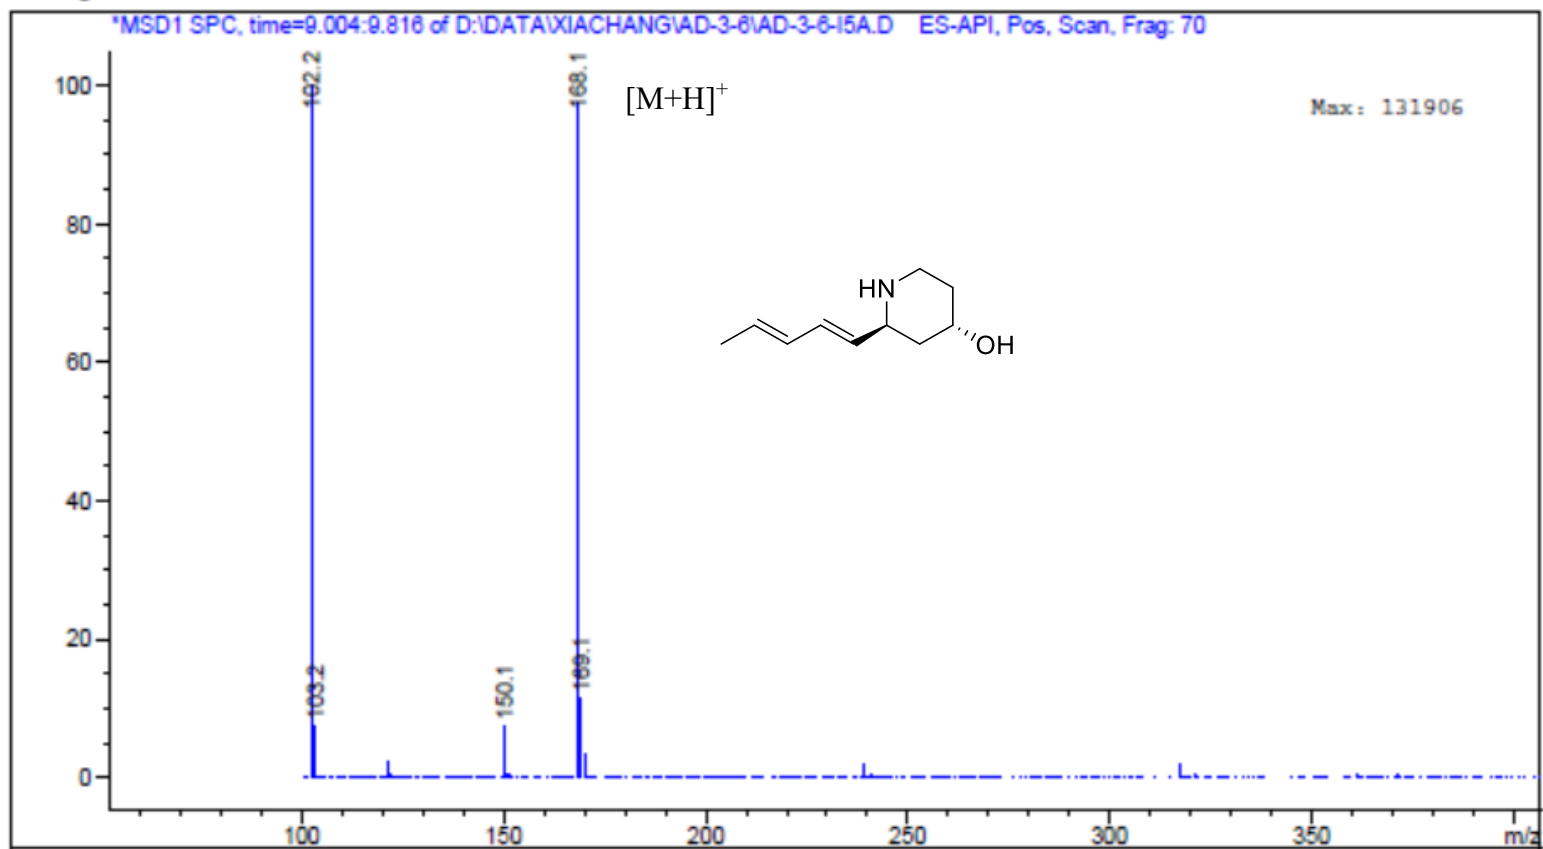

Figure S33. (+)-ESI-MS of [2 $\alpha$ (1*E*,3*E*),4 $\beta$ ]-2-(1,3-pentadienyl)-4-piperidinol (**9**)

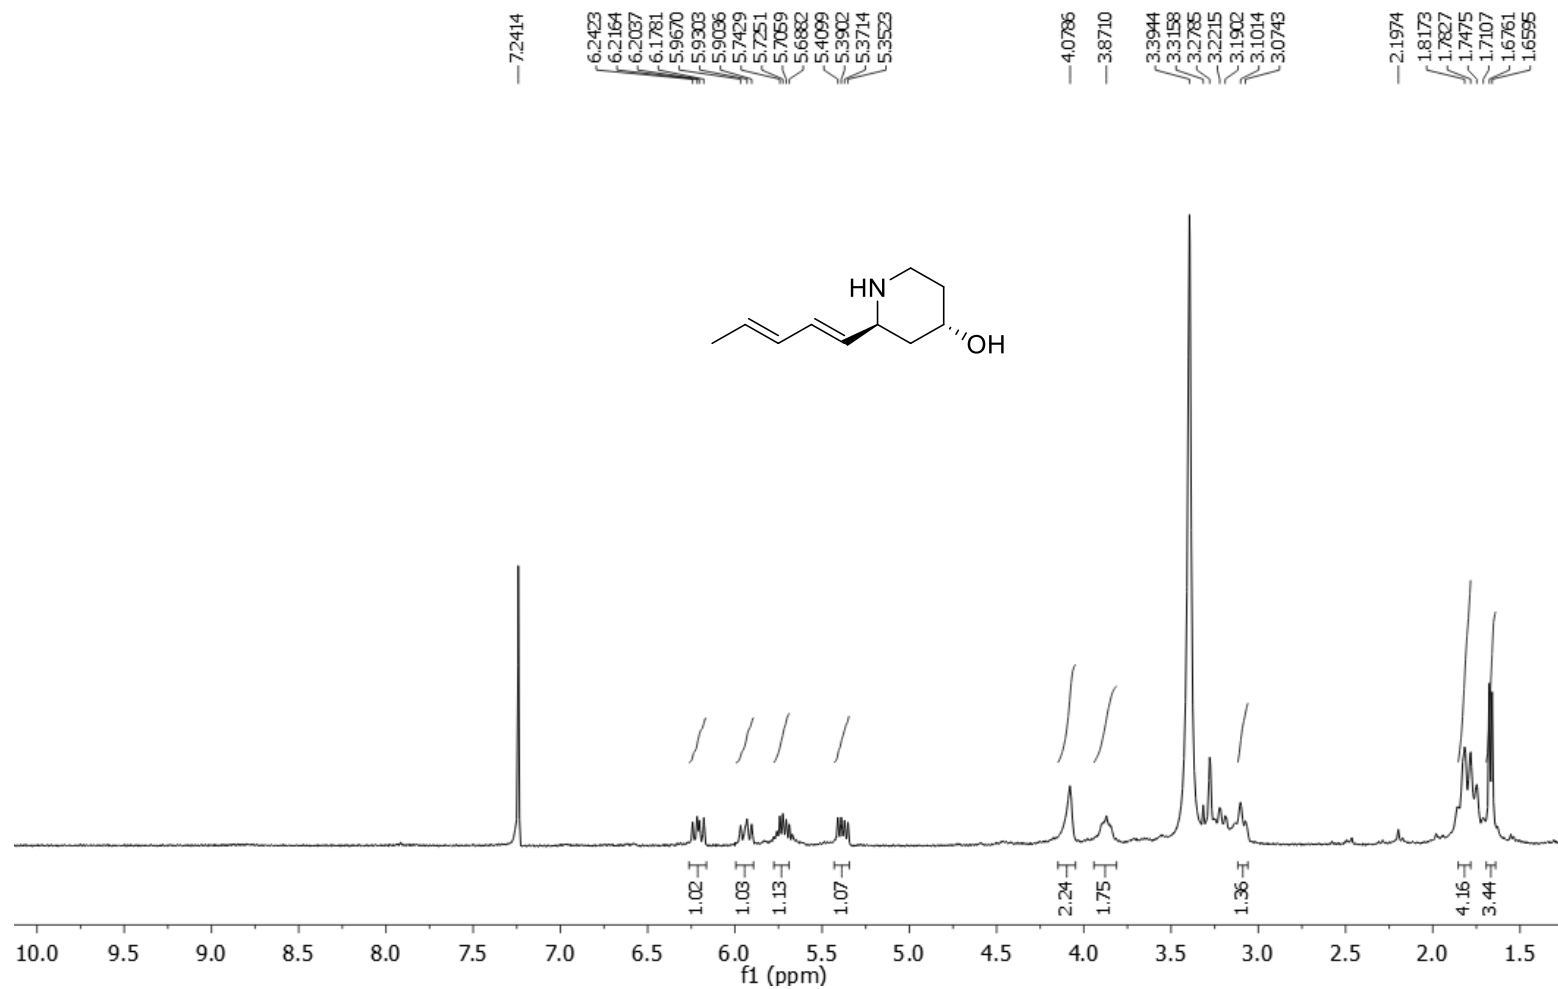

**Figure S34.** <sup>1</sup>H-NMR (CDCl<sub>3</sub>/CD<sub>3</sub>OD, 400 MHz) of [2α(1E,3E),4β]-2-(1,3-pentadienyl)-4-piperidinol (**9**)

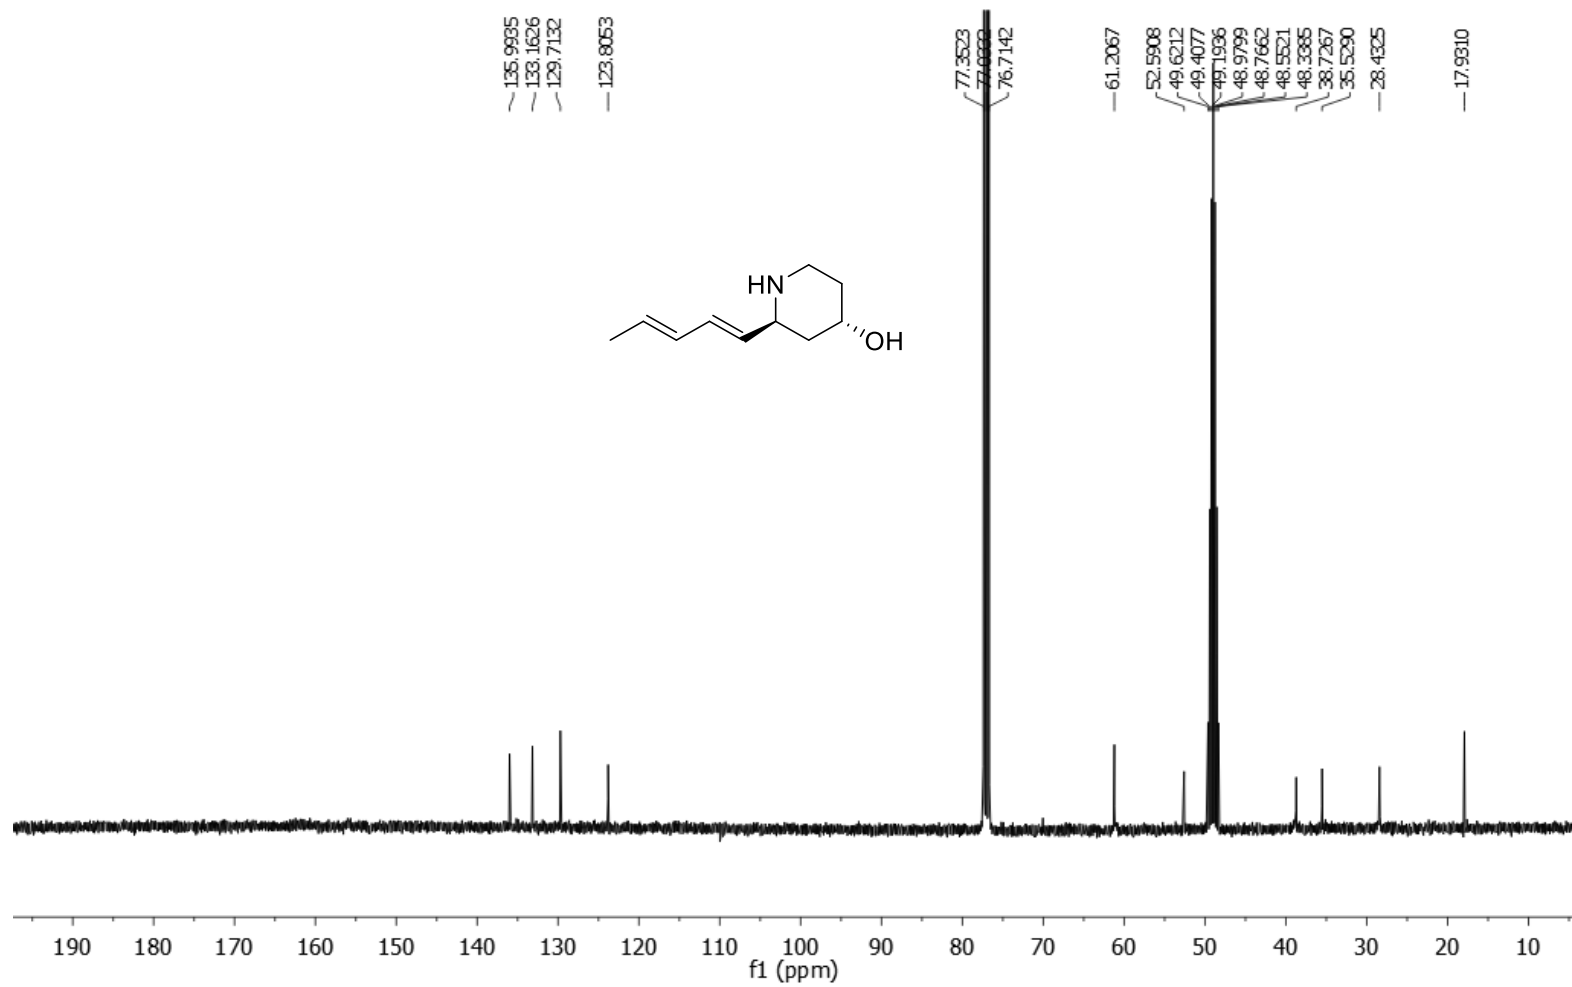

**Figure S35.** <sup>13</sup>C-NMR (CDCl<sub>3</sub>/CD<sub>3</sub>OD, 100 MHz) of [2α(1E,3E),4β]-2-(1,3-pentadienyl)-4-piperidinol (**9**)

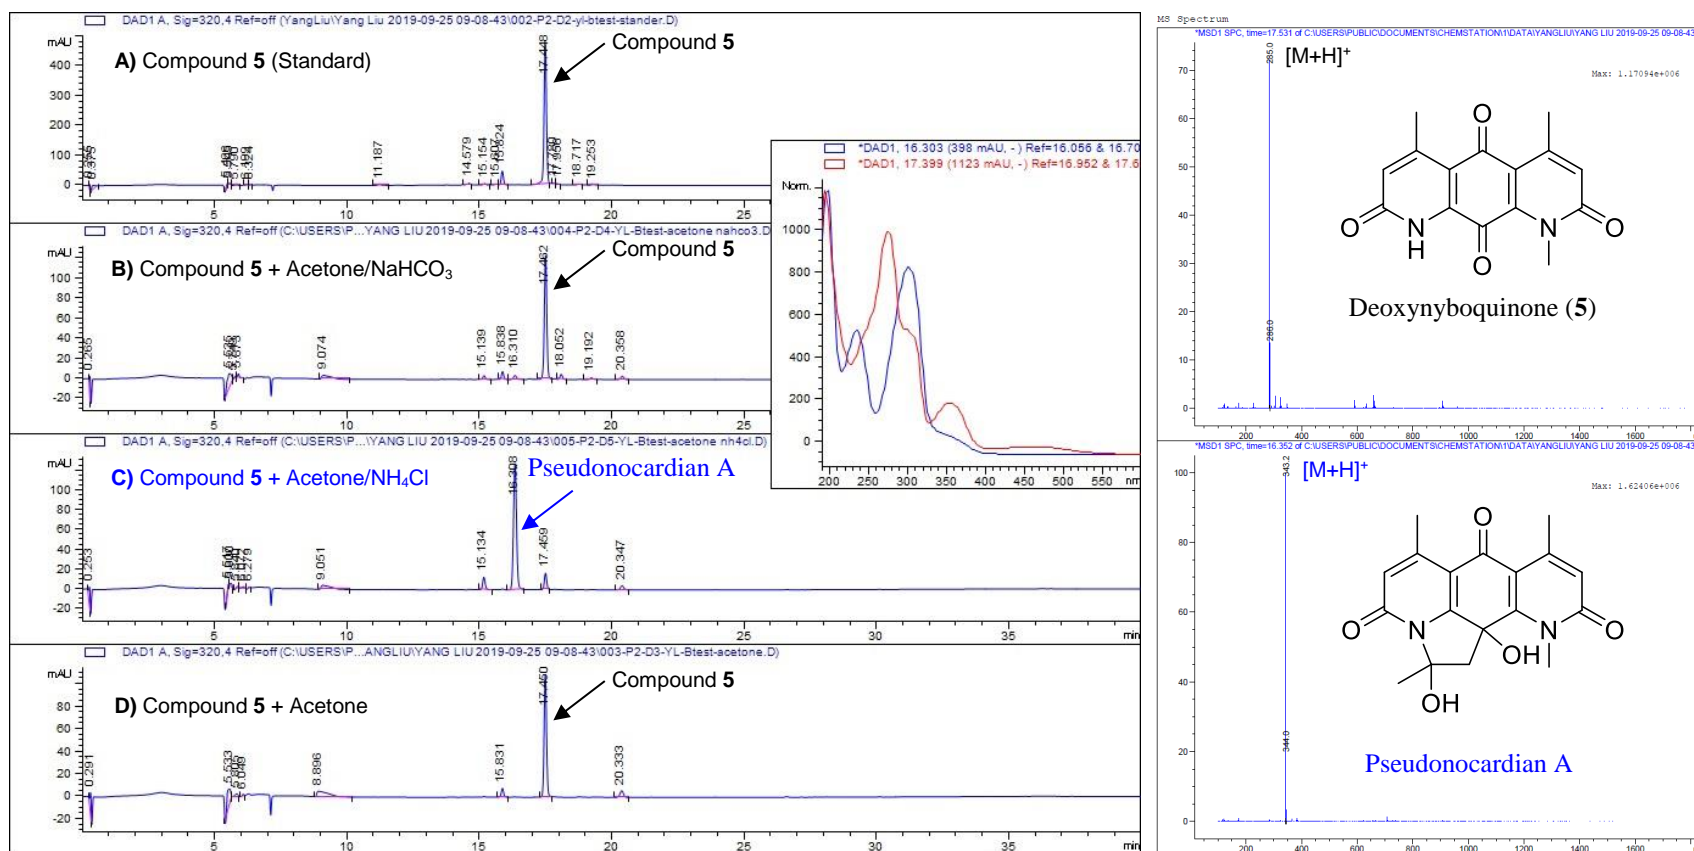

**Figure S36.** HPLC-UV/MS analyses of standard **5** and putative product pseudonocardian A. **A)** Standard sample of deoxynyboquinone (**5**). **B)** Aqueous saturated NaHCO<sub>3</sub> (100  $\mu$ L) was added to a solution of **5** (0.3 mg) in acetone (100  $\mu$ L) and mixture stirred at room temperature overnight followed by analysis via HPLC-MS. **C)** Aqueous saturated NH<sub>4</sub>Cl (100  $\mu$ L) was added to a solution of **5** (0.3 mg) in acetone (100  $\mu$ L) and mixture stirred at room temperature overnight followed by analysis via HPLC-MS. The new reaction product displayed a molecular weight (MW 342) and UV/vis profile consistent with pseudonocardian A. **D)** As a control, a solution of **5** (0.3 mg) in acetone (100  $\mu$ L) was stirred at room temperature overnight followed by analysis via HPLC-MS. HPLC-conditions: solvent A: H<sub>2</sub>O/0.1% FA; solvent B: CH<sub>3</sub>CN; flow rate: 0.5 mL min<sup>-1</sup>; 0-30 min, 5%-100% B; 30-35 min, 100% B; 35-36 min, 100%-5% B; 36-40 min, 5% B; Phenomenex C18 column (250  $\times$  4.6 mm, 5  $\mu$ m); 320 nm. UV-vis inset of full wavelength scan (190-600 nm). **Compound 5:** (+)-ESI-MS:  $m/z$  285 [M + H]<sup>+</sup>; **Pseudonocardian A:** (+)-ESI-MS:  $m/z$  343 [M + H]<sup>+</sup>
